1 **Speciation in sympatry with ongoing secondary gene flow and an olfactory trigger**  
2 **in a radiation of Cameroon cichlids**  
3

4 Jelmer W. Poelstra<sup>1,2</sup>, Emilie J. Richards<sup>1</sup>, & Christopher H. Martin<sup>1\*</sup>

5  
6 <sup>1</sup> Department of Biology, University of North Carolina at Chapel Hill,  
7 Chapel Hill, NC 27599-3280

8 <sup>2</sup> Department of Biology, Duke University, Durham NC 27708

9 Keywords: sympatric speciation, genomics, whole-genome sequencing, population genetics,  
10 demographics, coalescent, cichlids

11 Running title: sympatric speciation with gene flow

12 \*Corresponding author: [chmartin@unc.edu](mailto:chmartin@unc.edu)  
13  
14  
15  
16  
17  
18  
19  
20  
21  
22  
23  
24  
25  
26  
27  
28  
29  
30  
31  
32  
33

34 **Abstract**

35 Whether speciation can happen in the absence of geographical barriers and if so, under which  
36 conditions, is a fundamental question in our understanding of the evolution of new species. Among  
37 candidates for sympatric speciation, Cameroon crater lake cichlid radiations have been considered  
38 the most compelling. However, it was recently shown that a more complex scenario than a single  
39 colonization followed by isolation underlies these radiations. Here, we perform a detailed  
40 investigation of the speciation history of a radiation of *Coptodon* cichlids from Lake Ejagham using  
41 whole-genome sequencing data. The existence of the Lake Ejagham *Coptodon* radiation is  
42 remarkable since this 0.5 km<sup>2</sup> lake offers limited scope for divergence across a shallow depth  
43 gradient, disruptive selection is weak, the species are sexually monochromatic, yet assortative  
44 mating is strong. We infer that Lake Ejagham was colonized by *Coptodon* cichlids almost as soon  
45 as it came into existence 9,000 years ago, yet speciation events occurred only in the last 1,000-  
46 2,000 years. We show that secondary gene flow from a nearby riverine species has been ongoing,  
47 into ancestral as well as extant Lake Ejagham lineages, and we identify and date river-to-lake  
48 admixture blocks. One of these contains a cluster of olfactory receptor genes that introgressed  
49 close to the time of the first speciation event and coincides with a higher overall rate of admixture  
50 into the recipient lineages. Olfactory signaling is a key component of mate choice and species  
51 recognition in cichlids. A functional role for this introgression event is consistent with previous  
52 findings that assortative mating appears much stronger than ecological divergence in Ejagham  
53 *Coptodon*. We conclude that speciation in this radiation took place in sympatry, yet may have  
54 benefited from ongoing riverine gene flow.

## 55 **Author Summary**

56 Despite an active search for empirical examples and much theoretical work, sympatric speciation  
57 remains one of the most controversial ideas in evolutionary biology. While a host of examples have  
58 been described in the last few decades, more recent results have shown that several of the most  
59 convincing systems have not evolved in complete isolation from allopatric populations after all. By  
60 itself, documenting the occurrence of secondary gene flow is not sufficient to reject the hypothesis  
61 of sympatric speciation, since speciation can still be considered sympatric if gene flow did not  
62 contribute significantly to the build-up of reproductive isolation. One way forward is to use genomic  
63 data to infer where, when and into which lineages gene flow occurred, and identify the regions of  
64 the genome that experienced admixture. In this study, we use whole-genome sequencing to  
65 examine one of the cichlid radiations from a small isolated Cameroon lake, which have long been  
66 the flagship example of sympatric speciation. We show that gene flow from a riverine species into  
67 the lake has been ongoing during the history of the radiation. In line with this, we infer that the lake  
68 was colonized very soon after it was formed, and argue that Lake Ejagham is not as isolated as  
69 previously assumed. The magnitude of secondary gene flow was relatively even across Lake  
70 Ejagham lineages, yet with some evidence for differential admixture, most notably before the first  
71 speciation event into the *C. deckerti* and *C. ejagham* lineage. Among the sequences that were  
72 introgressed into this lineage is a cluster of olfactory receptor genes, which may have facilitated  
73 speciation by promoting sexual isolation between incipient species, consistent with previous  
74 findings that sexual isolation appears to be stronger than ecological isolation in Ejagham  
75 *Coptodon*. We conclude that speciation in this radiation took place in sympatry, yet may have  
76 benefited from ongoing riverine gene flow.

## 77 Introduction

78 Speciation in the absence of geographic barriers is a powerful demonstration that divergent  
79 selection can overcome the homogenizing effects of gene flow and recombination (Arnegard and  
80 Kondrashov, 2004, 2004; Coyne and Orr, 2004; Turelli et al., 2001). While it was long thought that  
81 sympatric speciation was very unlikely to take place in nature, the last 25 years have seen a  
82 proliferation of empirical examples as well as theoretical models that support its plausibility  
83 (Barluenga et al., 2006; Berlocher and Feder, 2002; Bolnick and Fitzpatrick, 2007; Hadid et al.,  
84 2013, 2014, Kautt et al., 2016a, 2016b; Malinsky et al., 2015; Savolainen et al., 2006; Sorenson et  
85 al., 2003).

86 However, it is exceptionally hard to demonstrate that speciation has been sympatric in any given  
87 empirical case. One of the most challenging criteria is that there has been no historical phase of  
88 geographic isolation (Coyne and Orr, 2004). This can be ruled out most compellingly in cases  
89 where multiple endemic species are found in environments that are (i) small and homogeneous,  
90 such that geographic isolation within the environment is unlikely, and are (ii) severely isolated, such  
91 that a single colonization likely produced the lineage that eventually diversified. Early molecular  
92 studies used a single locus or limited genomic data to establish monophyly of sympatric species in  
93 isolated environments such as crater lakes (Barluenga et al., 2006; Schlieven et al., 1994) and  
94 oceanic islands (Savolainen et al., 2006). Genome-wide sequencing data can now be used to  
95 rigorously test whether or not extant species contain ancestry from secondary gene flow into the  
96 environment. Strikingly, evidence for such ancestry has recently been found in all seven crater lake  
97 cichlid radiations examined so far (Kautt et al., 2016b; Malinsky et al., 2015; Martin et al., 2015a).  
98 However, whereas a complete lack of secondary gene flow would rule out a role for geographic  
99 isolation outside of the focal environment, the presence of secondary gene flow does not exclude  
100 the possibility of sympatric speciation.

101 If secondary gene flow into a pair or radiation of sympatric species has taken place, a key question  
102 is whether secondary gene flow played a role in the speciation process. Speciation would still be  
103 functionally sympatric if genetic variation introduced by secondary gene flow did not contribute to  
104 speciation (Martin et al., 2015a). Secondary gene flow could even counteract speciation in the  
105 focal environment, for instance via hybridization with both incipient species during a speciation  
106 event. On the other hand, there are several ways in which secondary gene flow may be a key part  
107 of speciation (Kautt et al., 2016b; Martin et al., 2015a). For instance, secondary colonization may  
108 involve a partially reproductively isolated population, in which case any resulting speciation event  
109 would have a crucial allopatric phase. Second, the introduction of novel genetic variation and novel  
110 allelic combinations may promote speciation more generally; for example, through the formation of  
111 a hybrid swarm (Seehausen, 2004).

112 Establishing or rejecting a causal role of secondary gene flow in speciation can be very difficult in  
113 any particular case, yet a first step is to examine the timing, extent, and identity of the donor and

114 recipient populations. A role for secondary gene flow would be supported if divergence rapidly  
115 followed a discrete admixture event (Kautt et al., 2016b); whereas, if gene flow took place only  
116 after the onset of divergence, such a role would seem unlikely. Genomic data can also be used to  
117 identify segments of the genome that have experienced admixture and to examine whether these  
118 contain genes that may have been important in speciation (Lamichhane et al., 2015; Meier et al.,  
119 2017; Richards and Martin, 2017).

120 Four radiations of cichlids in three isolated lakes in Cameroon (Schliewen and Klee, 2004;  
121 Schliewen et al., 2001, 1994) are one of the most widely accepted examples of sympatric  
122 speciation. Two of the lakes are crater lakes, while the third, Lake Ejagham, is now suspected to  
123 be the result of a meteor impact (Stager et al., 2017). Given their small size and uniform topology,  
124 geographic isolation within these lakes is unlikely (Schliewen et al., 1994). Moreover, species  
125 within the radiations were shown to be monophyletic relative to riverine outgroups based on  
126 mtDNA (for all four of the radiations, Schliewen et al., 1994) and AFLPs (for one radiation,  
127 Schliewen and Klee, 2004), which was interpreted to mean that each radiation is derived from a  
128 single colonization. However, using RAD-seq data, Martin et al. (2015a) recently found evidence  
129 for secondary admixture with nearby riverine populations in all four radiations.

130 Despite being the second smallest (0.49 km<sup>2</sup>) and one of the youngest lakes (ca. 9,000 ka, Stager  
131 et al., 2017) containing endemic cichlids, Lake Ejagham contains two independent endemic cichlid  
132 radiations, a two-species radiation of *Sarotherodon* cichlids (Neumann, 2011) and a four-species  
133 radiation of *Coptodon* cichlids (Dunz and Schliewen, 2010). The existence of these radiations is all  
134 the more remarkable given that they are an exception to the two best predictors of endemic  
135 radiation in African cichlids: lake depth and sexual dichromatism (Wagner et al., 2012). Sympatric  
136 cichlid species pairs are commonly distributed over a large depth gradient (Kautt et al., 2016a,  
137 2016b; Malinsky et al., 2015), yet Lake Ejagham is shallow (maximum depth of 18 m, Schliewen et  
138 al., 2001), and at least three species are completely interspersed in the same depth range (Martin,  
139 2013). While no sexual dichromatism occurs among Ejagham *Coptodon*, all species differ most  
140 strongly in sexual rather than ecological characters (Martin, 2013), and strong assortative mating  
141 appears to be a more significant force than weak disruptive selection (Martin, 2012), which is  
142 noteworthy since speciation in Cameroon lakes is generally considered to be ecologically driven  
143 (Coyne and Orr, 2004).

144 Some of the clearest evidence for admixture in (Martin et al., 2015a) came from the three species  
145 of Ejagham *Coptodon* that were examined. The occurrence of secondary gene flow from riverine  
146 populations could be a key piece in the puzzling occurrence of the Lake Ejagham radiations, and  
147 may have initiated speciation despite limited disruptive ecological selection. Here, we use whole-  
148 genome sequencing of three species of Ejagham *Coptodon* and two riverine outgroups to provide  
149 a comprehensive picture of the history of secondary gene flow and its riverine sources, and identify  
150 admixed portions of the genome.

## 151 Results

### 152 *Phylogeny of the Lake Ejagham Coptodon radiation*

153 As a first step in revealing the speciation history of the Lake Ejagham *Coptodon* radiation  
154 (hereafter: Ejagham radiation), we took several approaches to infer the phylogenetic relationships  
155 among the three Lake Ejagham species *C. deckerti*, *C. ejagham* and *C. fusiforme*, as well as two  
156 closely related riverine species from the neighboring Cross River drainage, *C. guineensis* and *C.*  
157 *sp. Mamfé* (Fig 1), *C. kottae*, a Cameroon crater lake endemic that did not diversify in situ, and the  
158 much more distantly related *Sarotherodon galilaeus*.

159 Maximum likelihood (ML) trees based on concatenated genome-wide SNPs using RaxML  
160 with any of three outgroup configurations (only *C. kottae* / only *S. galilaeus* / both species) resulted  
161 in monophyly of Lake Ejagham species and a sister relationship between *C. deckerti* and *C.*  
162 *ejagham* with 100% bootstrap support (Fig 2A). However, inferences on whether one of the two  
163 riverine species is more closely related to Ejagham *Coptodon*, or the two are sister species,  
164 differed among outgroup configurations (Fig S1). To further investigate the relationships among the  
165 two riverine species relative to Ejagham *Coptodon*, we constructed species trees based on 100 kb  
166 gene trees. Species trees based on rooted gene trees using ML and the Minimize Deep  
167 Coalescence (MDC) criterion in Phylonet, as well as a species tree based on unrooted gene trees  
168 using ASTRAL, all indicated monophyly of the Ejagham radiation, and a sister relationship between  
169 *C. deckerti* and *C. ejagham* (Fig S2).

170 We used two methods to more explicitly examine the prevalence of discordant phylogenetic  
171 patterns. In keeping with the results from phylogenetic trees, a phylogenetic network based on  
172 genome-wide SNPs produced by Splitstree showed limited discordance along the branch to the  
173 Ejagham *Coptodon* ancestor, with higher levels of discordance along the branch to the *C. deckerti* -  
174 *C. ejagham* ancestor and especially near the divergence of the riverine species (Fig 2B). Second,  
175 phylogenetic relationships along local segments of the genome grouped by the machine-learning  
176 approach *Saguaro* into 30 unrooted trees ("cacti") indicate that in 90.02% of the genome, Ejagham  
177 *Coptodon* and the two riverine species each form exclusive clades (Fig 2C, S3 Fig, S7 Table).  
178 Similarly, in 87.61% of the genome, individuals in each of the three Ejagham species grouped  
179 monophyletically (Fig 2C, S7 Table).

### 180 *Genome-wide tests of admixture suggest ongoing gene flow from C. sp. Mamfé*

181 To further investigate admixture between riverine and Lake Ejagham taxa, we first used genome-  
182 wide formal tests of admixture. Genome-wide D-statistics in configurations that test for admixture  
183 between one of the two riverine species and an Ejagham *Coptodon* species, repeated for each  
184 Ejagham species, all indicate admixture between *C. sp. Mamfé* and Ejagham *Coptodon* (Fig 3A,  
185 top three bars). Values of *D* were very similar (0.1578 - 0.1594) across the three Ejagham species,  
186 indicating similar levels of admixture from *C. sp. Mamfé*. This suggests that admixture may have

187 predominantly taken place prior to diversification within Lake Ejagham.

188 We tested this interpretation using five-taxon  $D_{\text{FOIL}}$  statistics (Fig 3B).  $D_{\text{FOIL}}$  statistics take  
189 advantage of derived allele frequency patterns in a symmetric phylogeny across two pairs of  
190 populations with dissimilar coalescence times. The combination of signs (positive, negative, or  
191 zero) across four  $D_{\text{FOIL}}$  statistics can distinguish between admixture along terminal branches and  
192 admixture with the ancestral population of the most recently diverged population pair. Here, we  
193 repeated the test with each of three possible pairs of Lake Ejagham species as P1 and P2, and as  
194 P3 and P4 the pair of riverine species, which diverged prior to the Ejagham species (see next  
195 section).  $D_{\text{FOIL}}$  statistics using both pairs of Lake Ejagham taxa that involve *C. fusiforme* indicated a  
196 pattern of admixture between *C. sp. Mamfé* and the Lake Ejagham ancestor (Fig 3B, left).  $D_{\text{FOIL}}$   
197 statistics are designed to uncover a single admixture pattern, such that multiple instances of gene  
198 flow may lead to a combination of signs across  $D_{\text{FOIL}}$  statistics without a straightforward  
199 interpretation, which may explain the pattern observed for the comparison with *C. deckerti* and *C.*  
200 *ejagham* as P1 and P2 (Fig 3B, right).

201 Consistent with more complex patterns of admixture, D-statistics for comparisons that  
202 explicitly test for differential admixture between Ejagham species with *C. sp. Mamfé* indicate that  
203 *C. ejagham* and *C. deckerti* experienced slightly higher levels of admixture than *C. fusiforme* after  
204 their divergence (Fig 3A, bottom bars). Furthermore, an  $f_4$ -ratio test suggests that 4.7% of *C.*  
205 *ejagham* ancestry derives from admixture with *C. sp. Mamfé* during or after its divergence from *C.*  
206 *deckerti* (Fig 3C), but it should be noted that D-statistics did not indicate differential admixture for  
207 this comparison (Fig 3A, bottom bar). Overall, we infer that differential gene flow from *C. sp.*  
208 *Mamfé* into the three Ejagham species has been relatively minor in comparison to gene flow  
209 shared among the species. This difference in magnitude can be clearly seen in Fig 3A, where the  
210 upper three bars represent shared gene flow and the lower three bars differential gene flow to  
211 Ejagham species.

## 212 *A detailed reconstruction of the demographic speciation history of the Ejagham* 213 *radiation*

214 To infer post-divergence rates of gene flow, divergence times, and population sizes among the  
215 extant and ancestral Lake Ejagham lineages and the two riverine species, we used the  
216 Generalized Phylogenetic Coalescent Sampler (G-PhoCS), providing the species tree topology  
217 inferred above. Gene flow rates in G-PhoCS can be estimated using specific “migration bands”  
218 between any two lineages that overlap in time. We focused on migration bands that had a riverine  
219 lineage as the source population and an extant or ancestral Lake Ejagham lineage as the target  
220 population. We first inferred rates in models with single migration bands, and next combined  
221 significant migration bands in models with multiple migration bands. While models with all  
222 migration bands performed more poorly due to the high number of parameters (see Methods),

223 models with single migration bands may be prone to overestimation of that specific migration rate.  
224 We therefore also ran models with an intermediate number of migration bands (either to all three  
225 extant Ejagham species or to both ancestral lineages), and present results for all of these different  
226 models in Fig 4, and Table 1. Divergence times and population sizes mentioned below represent  
227 only those from models with all significant migration bands.

228 Divergence between the ancestral riverine and Lake Ejagham lineages was estimated to  
229 have occurred around 9.76 ka ago (95% HPD: 8.27-11.23, Fig 4A), which we consider an estimate  
230 of the timing of the colonization of Lake Ejagham. Encouragingly, this coincides with the age of the  
231 lake estimated from core samples (9 kya: Stager et al. 2017). In contrast to rapid colonization of  
232 the new lake, we estimated that the first speciation event in Lake Ejagham lineage only occurred  
233 1.20 [0.81-1.62] ka ago, rapidly followed by the second 0.69 [0.29-1.10] ka ago. These divergence  
234 dates remained relatively similar even in models with no gene flow (point estimates 8.80, 2.15, and  
235 1.05 ka ago, Fig 4B).

236 Inferred effective population sizes among Ejagham *Coptodon* varied about fourfold. We  
237 inferred a smaller effective population size for *C. ejagham* ( $N_e = 933$  [406-1,524]) compared to the  
238 other two crater lake species (*C. deckerti*: 3,680 [1,249-6,539], *C. fusiforme*: 2,864 [1,514-4,743],  
239 Table 1, Fig 4E-F), which is in line with field observations of its rarity (Martin, 2013) and with its  
240 piscivorous ecology (Dunz and Schliewen, 2010).

241 In agreement with the results from genome-wide admixture statistics, we infer that  
242 secondary gene flow from riverine species has taken place mostly or only from *C. sp. Mamfé*  
243 relative to *C. guineensis*. In models with single migration bands, significant gene flow was inferred  
244 from *C. sp. Mamfé* into all Ejagham lineages (Fig 4D-F). Rates of gene flow to ancestral  
245 populations dropped relative to extant lineages in models with all migration bands, in particular for  
246 gene flow to the lineage ancestral to all three species (Fig 4D-F).

247 Overall, G-PhoCS inferred similar rates of gene flow from *C. sp. Mamfé* to extant species  
248 (Fig 4D-F). Nevertheless, due to a higher inferred rate to the *C. deckerti* - *C. ejagham* ancestor  
249 than to *C. fusiforme*, we infer that since its divergence, *C. fusiforme* experienced less gene flow  
250 than *C. deckerti* and than *C. ejagham* (40.6% and 43.2% less, respectively, in terms of the “total  
251 migration rate” estimated in single migration band models), which agrees with the result from D-  
252 statistics (Fig 3A). However, due to the higher rate inferred in the band between *C. sp. Mamfé* and  
253 the Ejagham ancestor, and the longer time span of this band, the estimated total migration rate  
254 since the split of the ancestral Ejagham lineage differs only by 6.63% between *C. fusiforme* and *C.*  
255 *ejagham*, 6.39% between *C. fusiforme* and *C. deckerti*, and 0.67% between *C. deckerti* and *C.*  
256 *ejagham* (Table 1, Fig 4D-F).

257 We did not find clear evidence for gene flow into Ejagham *Coptodon* from other sources  
258 besides *C. sp. Mamfé* using G-PhoCS. All rates of gene flow into Lake Ejagham lineages from *C.*



259 *guineensis* or from the riverine ancestor (prior to the split between *C. sp. Mamfé* and *C.*  
260 *guineensis*) had 95% HPD intervals that overlapped with zero, and all except two had means very  
261 close to zero (Table 1, S4A Fig). Only the estimates of gene flow from *C. guineensis* into the two  
262 ancestral Ejagham lineages had mean population migration rates above 0.01 (0.18 and 0.47) and  
263 high variance (S4A Fig), suggesting either the possibility of low levels of ancestral gene flow from  
264 *C. guineensis*, or that gene flow from *C. guineensis* at that period may be conflated with gene flow  
265 from *C. sp. Mamfé*. In support of the latter idea, in models that combined gene flow to ancestral  
266 Ejagham lineages from *C. sp. Mamfé* and *C. guineensis*, gene flow from *C. guineensis* was again  
267 not different from zero, while variance was much smaller, and gene flow from *C. sp. Mamfé*  
268 remained significant (S4B Fig).

269 We also did not find clear evidence for gene flow among Ejagham *Coptodon* lineages using G-  
270 PhoCS. We evaluated models with each one of all possible migration bands in both directions, and  
271 95% HPD for all migration rates overlapped with zero (S4C Fig). The mean inferred population  
272 migration rate was higher than 0.01 only for *C. fusiforme* to *C. deckerti* (0.27) and to *C. ejagham*  
273 (0.02). Such limited evidence for post-divergence gene flow within the radiation is surprising, given  
274 that these species are in the earliest stages of speciation (Martin, 2013). However, caution is  
275 warranted given that the very recent divergence of these lineages may render it difficult to identify  
276 ongoing gene flow. Furthermore, representative breeding pairs at the tail ends of the phenotype  
277 distribution were selectively chosen for sequencing (Martin, 2012), while excluding ambiguous  
278 individuals that could not be assigned to a particular species.

### 279 *Admixture blocks support ongoing gene flow from C. sp. Mamfé*

280 To identify genomic blocks of admixture between riverine and Lake Ejagham species, we first  
281 defined putative blocks as contiguous sliding windows that were outliers for  $f_d$ , a four-population  
282 introgression statistic related to  $D$  that is suitable for application to small genomic regions, and  
283 subsequently applied HybridCheck (Ward and van Oosterhout, 2016) to validate and age these  
284 blocks. We used all combinations of ingroup triplets that could differentiate between admixture from  
285 *C. guineensis* and *C. sp. Mamfé*, as well as those that could identify differential admixture among  
286 Lake Ejagham species (from either riverine species) (S8 Table). Of 1,138 putative blocks identified  
287 as  $f_d$  outliers, 340 were validated by HybridCheck (93 from *C. guineensis*, and 247 from *C. sp.*  
288 *Mamfé*). While such blocks represent areas with ancestry patterns consistent with admixture, these  
289 patterns can also be produced by incomplete lineage sorting (ILS). To distinguish between ILS and  
290 admixture, we took advantage of our estimates of block age (coalescence time between the focal  
291 species pair) from HybridCheck and our estimates of divergence times from G-PhoCS. While  
292 nearly a quarter of blocks were estimated to be older than the Lake Ejagham lineage, and  
293 therefore likely represent ILS (S5 Fig), we identified 259 “likely” candidate regions (with a point  
294 estimate of age younger than that of the Lake Ejagham lineage), including a subset of 146 “high-  
295 confidence” regions (with non-overlapping confidence intervals of age estimates), resulting from

296 secondary gene flow into Ejagham. In total, high-confidence admixture blocks spanned across only  
297 0.64% of the queried part of the genome (5.7 Mb).

298 In accordance with the much stronger evidence for Lake Ejagham admixture with *C. sp.*  
299 *Mamfé* than with *C. guineensis*, the majority of likely (68.3%) and high-confidence (80.1%)  
300 admixture blocks involved *C. sp. Mamfé* as the riverine species, and likely and high-confidence  
301 admixture blocks with *C. sp. Mamfé* were, on average, younger (2.94 and 1.37 ka, respectively)  
302 than those with *C. guineensis* (4.55 and 1.97 ka, respectively, Fig 5A).

303 Because  $f_d$  and HybridCheck detect admixture only between species pairs, we took two  
304 approaches to investigate at which point along the Lake Ejagham phylogeny admixture took place  
305 for likely admixture blocks. First, we intersected admixture blocks involving different Lake Ejagham  
306 species but the same riverine species, and detected 76 likely (and 38 high-confidence) blocks  
307 involving a single Lake Ejagham species, 88 (50) blocks shared among two Lake Ejagham  
308 species, and 95 (87) blocks shared among all three Lake Ejagham species (Fig 5B). Thus, 29.3%  
309 of likely blocks (and 26.0% of high-confidence blocks) were unique to a single lake species, but  
310 this may be an overestimate, since such blocks may have been present but escaped statistical  
311 detection in other species, for instance due to recombination within the block. This possibility is  
312 underscored by the age distribution of admixture blocks: admixture blocks detected in one species  
313 were not younger than those detected in multiple species (S5 Fig). In line with results from  
314 genome-wide admixture statistics and G-PhoCS, we found more admixture blocks into *C. deckerti*,  
315 *C. ejagham*, and their ancestor, compared to *C. fusiforme* (Fig 5B).

316 Second, we used  $D_{\text{FOIL}}$  statistics to distinguish between admixture involving the ancestral  
317 Lake Ejagham lineage (“DEF”), the *C. deckerti* – *C. ejagham* ancestor (“DE”), and the terminal  
318 branches. We were able to categorize 23 likely (and 13 high-confidence) admixture blocks with  
319  $D_{\text{FOIL}}$  statistics, showing a pattern of decreasing occurrence of admixture blocks through time, with  
320 only a single likely (and 0 high-confidence) block involving a terminal Lake Ejagham branch (Fig  
321 5C). For cases where admixture is with an ancestral (lake) clade,  $D_{\text{FOIL}}$  statistics cannot infer the  
322 direction of introgression, but the single classified admixture block with an extant lake taxon is, as  
323 expected, inferred to have been into the lake.

### 324 *Admixture of olfactory genes into C. deckerti and C. ejagham*

325 Among all high-confidence blocks, 11 gene ontology terms were enriched (Table 2). Eight genes in  
326 a single admixture block on scaffold NC\_022214.1 were responsible for the three most enriched  
327 categories; seven of these genes are characterized as olfactory receptors and the eighth as  
328 “olfactory receptor-like protein” (none have a gene name and only one has 1-to-1 orthologues in  
329 other species on Ensembl Release 90 (S10 Table)). The admixture block containing this cluster of  
330 genes, which is shown in Fig 5D, was estimated to have introgressed from *C. sp. Mamfé* into both  
331 *C. deckerti* and *C. ejagham* 2,486 (1,651-3,554) years ago, shortly prior to the divergence of the *C.*

332 *deckerti* / *C. ejagham* ancestor from *C. fusiforme*, 1,205 (806-1,616) years ago. Among all high-  
333 confidence admixture blocks, this block was the largest, had the highest summed  $f_d$  score, and had  
334 the second lowest HybridCheck p-value.

335 When performing GO analyses separately for blocks involving each Lake Ejagham species,  
336 no additional terms were found to be enriched. With respect to admixture blocks involving each  
337 Lake Ejagham species, the same 11 terms were enriched for *C. ejagham*, nine of these terms were  
338 enriched for *C. deckerti*, and none were enriched for *C. fusiforme* (Table 2). Blocks unique to one  
339 Lake Ejagham species (either taken together, or separately by species), were not enriched for any  
340 terms, while blocks shared between two species were enriched for nine terms and blocks shared  
341 between all three species for two terms (Table 2).

342

343

## 344 **Discussion**

345 In the context of an isolated lake, a classic case of fully sympatric speciation would involve i)  
346 colonization of the lake by a single lineage, effectively in a single event, and ii) no subsequent  
347 gene flow with populations outside of the lake prior to or during speciation. Our results suggest that  
348 for the Lake Ejagham *Coptodon* radiation, the former is true but the latter is not. In contrast to the  
349 original paradigm of a highly isolated lake colonized only once by a single cichlid pair (Schliewen et  
350 al. 2001), we found ongoing gene flow from one of the riverine species into all three species in the  
351 lake throughout their speciation histories. Interestingly, one of the clearest signals of introgression  
352 came from a cluster of olfactory receptor genes that introgressed into the ancestral population at xx  
353 kya just prior to the first speciation event, suggesting that gene flow may have facilitated  
354 speciation.

### 355 *Rapid initial colonization of Lake Ejagham*

356 Our estimates of the origin of the Ejagham *Coptodon* lineage (9.76 ka ago, Fig. 4A) were nearly  
357 identical to the estimated date of the origin of the lake itself (9 ka years ago, Stager et al., 2017),  
358 suggesting that the lake was rapidly colonized by the ancestral lineage. It should be noted that this  
359 estimate in turn relies on an estimate of the mutation rate. We here use estimates from  
360 sticklebacks (Guo et al., 2013) as previous studies on cichlids have done (Kautt et al., 2016a,  
361 2016b), but it cannot be excluded that our focal species have substantially different mutation rates  
362 (Martin and Höhna, 2017; Martin et al., 2017; Recknagel et al., 2013).

363 Martin et al. (2015a) argued that the Cameroon lakes containing cichlid radiations may not be as  
364 isolated as has previously been suggested, based on the inference of secondary gene flow in all  
365 radiations, and the fact that each lake has been colonized by several fish lineages (five in the case  
366 of Lake Ejagham). Our inference of a rapid, successful colonization process and evidence for

367 ongoing gene flow are both in support of this view. In this light, it is worth pointing out that lake  
368 Ejagham (i) has an outflow in the wet season (S6 Fig) which may be connected to the Munaya  
369 River (itself part of the Cross River system), (ii) does *not* have a waterfall that could prevent fish  
370 from entering the lake (C. H. Martin, pers. obs.) contrary to claims elsewhere (Bolnick and  
371 Fitzpatrick, 2007), and (iii) is at an elevation of only 141 meters, about 60 meters higher than the  
372 closest river drainage (the other two Cameroon lakes containing sympatric radiations, Lake  
373 Barombi Mbo and Lake Beme, are at altitudes of 314 and 472 meters, respectively).

#### 374 *No major secondary colonizations*

375 Our data suggest that the initial colonization of the lake established the large majority of the  
376 lineage that has since diversified within Lake Ejagham, and we find no evidence for major  
377 secondary colonizations that either established a new lineage or resulted in a hybrid swarm.  
378 Several lines of evidence indicate that such events are unlikely to have taken place. First,  
379 considerable phylogenetic conflict would be expected if diversification happened rapidly after a  
380 secondary colonization event, while we found particularly widespread monophyly across the  
381 genome (89.34%, S7 Table). Second, we inferred a long time lag between colonization and the first  
382 speciation event within the lake (9.76 ka and 1.20 ka ago, respectively, Fig 4A, Table 1). Third, we  
383 estimated gene flow into the ancestral lake lineage to be relatively low (Fig 4B), and in line with  
384 this, models with and without post-divergence gene flow between riverine and lake lineages  
385 resulted in similar (9.76 and 8.80 ka ago, respectively, Table 1) estimates of the divergence time of  
386 the ancestral lake lineage.

#### 387 *Continuous low levels of gene flow from one of two Cross River Coptodon species*

388 Even though we found that Ejagham *Coptodon* was established by a single major colonization, our  
389 results are not consistent with subsequent isolation of the lake lineages. We found evidence for  
390 ongoing secondary gene flow from the source population, which diverged into *C. guineensis* and *C.*  
391 *sp. Mamfé* after the split with the Ejagham lineage. Results from all three types of approaches that  
392 we used to identify secondary gene flow (demographic analysis with G-PhoCS, genome-wide  
393 admixture statistics, and the identification of admixture blocks) show that gene flow originated  
394 predominantly from one of these riverine lineages, *C. sp. Mamfé* (Fig 3A, 4B, 5). Little is known  
395 about the precise geographic distribution of *C. sp. Mamfé*, yet this asymmetry is consistent with the  
396 sampling location of this species (37 km from Lake Ejagham to the Cross River at Mamfe) relative  
397 to that of *C. guineensis* (65 km from Lake Ejagham to a tributary of the Cross River at Nguti; see  
398 also Fig 1 that depicts all major rivers). Both *Coptodon* lineages are known to coexist within the  
399 Cross River drainage. Our data suggest that *C. sp. Mamfe* is most likely a new species.

400 Evidence for gene flow from *C. guineensis* was much weaker compared to *C. sp. Mamfé*  
401 and was mostly restricted to ancestral Lake Ejagham lineages (admixture blocks: Fig 5, G-PhoCS:  
402 S4A-B Fig). It should furthermore be noted that the assignment of the riverine source lineage is

403 likely to be more error-prone further back in time, given the recent divergence between *C.*  
404 *guineensis* and *C. sp. Mamfé*. However, the clearest evidence of gene flow from *C. guineensis*  
405 comes from admixture blocks, where an inference of differential ancestry from the two riverine  
406 species was required. Since we were only able to include a single *C. sp. Mamfé* individual, it is  
407 nevertheless possible that we missed genetic variation in that species, which may have led to  
408 incorrect assignment as the riverine source lineage as *C. guineensis*.

#### 409 *Differential admixture of Ejagham radiation with riverine Coptodon*

410 We found some evidence for differential riverine admixture, from *C. sp. Mamfé*, among the three  
411 Ejagham species. While the admixture proportion of *C. ejagham* may be slightly higher than that of  
412 *C. deckerti* ( $f_4$ -ratio test: Fig 3B, but see D-statistics, Fig 3A, and G-PhoCS: Fig 4A-C), the  
413 evidence was stronger for elevated riverine admixture with sister species *C. deckerti* and *C.*  
414 *ejagham* relative to *C. fusiforme* (D-statistics: Fig 3A, admixture blocks: Fig 5), which specifically  
415 appears to originate from high admixture with the *C. deckerti* / *C. ejagham* ancestor (G-PhoCS: Fig  
416 4B). In accordance with this, Martin et al. (2015a) identified riverine admixture with the *C. deckerti* /  
417 *C. ejagham* ancestor using Treemix. Martin et al. (2015a) found that a proportion of *C. fusiforme*  
418 individuals appeared more admixed than any other Ejagham *Coptodon*. The magnitude of the  
419 effect in their PCA plot (Fig 3C in Martin et al., 2015a), as well as the fact that only some of the *C.*  
420 *fusiforme* individuals were involved, suggests contemporary hybridization; however, this was not  
421 supported by their STRUCTURE analysis of the same data. Nonetheless, contemporary  
422 hybridization may have resulted from the known introduction of riverine fishes into this lake by a  
423 local town council member in 2000-2001 (Martin, 2012). This resulted in the establishment of a  
424 *Parauchenoglanis* catfish within the lake, still recorded as abundant in 2016 (CHM pers. obs.).  
425 However, no riverine *Coptodon* have been confirmed beyond a posted sign reporting introduced  
426 river fishes. In this study, we found no evidence that any of our individuals were recent hybrids (Fig  
427 S4), but our limited sample sizes preclude us from any strong inferences on their potential  
428 occurrence in the lake.

#### 429 *Introgression of a cluster of olfactory receptor genes shortly prior to speciation*

430 Complex patterns of secondary gene flow such as those observed here are not easily interpreted  
431 in terms of their contribution to speciation. The formation of hybrid swarms has been suggested to  
432 promote speciation (Kautt et al., 2016a; Seehausen, 2004), yet we did not find evidence for major  
433 secondary colonizations, or a specific admixture event that could be linked to the timing of  
434 speciation. Instead, we inferred ongoing gene flow, which could theoretically inhibit speciation, by  
435 counteracting incipient divergence within the lake, or promote speciation, by introducing novel  
436 genetic variation or co-adapted gene complexes.

437 Interestingly, one admixture block contained a cluster of eight olfactory receptor genes (S10 Table),  
438 causing a highly significant overrepresentation of several gene ontology terms containing these

439 genes (Table 2). While in mammals, the Olfactory Receptor (OR) gene family is the largest gene  
440 family with around 1,000 genes, mostly due to the expansion of a single group of genes, fish  
441 species examined so far have much fewer (69-158 complete genes) yet a more diverse set of OR  
442 genes (Azzouzi et al., 2014; Niimura and Nei, 2005). Unfortunately, little additional information is  
443 known about the eight admixed olfactory receptor genes.

444 This cluster of OR genes was contained in the largest and arguably most striking of all high-  
445 confidence admixture blocks (Fig 5D), which is estimated to have introgressed from *C. sp. Mamfé*  
446 into *C. deckerti* and *C. ejagham*, but not *C. fusiforme*, just prior to the estimated divergence time of  
447 *C. fusiforme* and the ancestor of *C. deckerti* and *C. ejagham*. Thus, the timing, source and target of  
448 introgression all correspond with the inference of elevated levels of gene flow from *C. sp. Mamfé* to  
449 the *C. deckerti* - *C. ejagham* ancestor relative to *C. fusiforme* (Fig 3A, Fig 4B, Fig 5). These  
450 patterns may suggest a role for the introgression of this block in initiating speciation in Ejagham  
451 *Coptodon*.

452 Chemosensory signaling in general, and olfactory receptors specifically, have often been linked to  
453 speciation, especially with respect to sexual isolation (Smadja and Butlin, 2008). A host of studies  
454 has shown the importance of olfactory signaling in conspecific mate recognition in fish (Crapon de  
455 Caprona and Ryan, 1990; Kodric-Brown and Strecker, 2001; McLennan, 2004; McLennan and  
456 Ryan, 1999), and in a pair of closely related Lake Malawi cichlids, female preference for  
457 conspecific males was shown to rely predominantly if not exclusively on olfactory cues  
458 (Plenderleith et al., 2005). Not surprisingly, it has repeatedly been suggested that olfactory signals  
459 may help explain explosive speciation in cichlids (Azzouzi et al., 2014; Blais et al., 2009; Keller-  
460 Costa et al., 2015).

461 Olfactory signaling seems particularly relevant to mate choice and speciation in Ejagham  
462 *Coptodon*, since three species occur syntopically, assortative mating by species appears to  
463 represent the strongest isolating barrier (Martin, 2012, 2013), and sexual dichromatism is absent.  
464 Important next steps will be to examine the importance of olfactory cues in mate recognition in  
465 Lake Ejagham *Coptodon*, specifically between *C. fusiforme* and the other two species, and to  
466 characterize these genes and their patterns of divergence and admixture in more detail.

#### 467 *Waiting time for sympatric speciation*

468 While we inferred that colonization of Lake Ejagham took place more than 9 ka years ago, the first  
469 branching event among Ejagham *Coptodon* was estimated to have occurred as recently as 1.20 ka  
470 years ago (Fig 4A, Table 1). We did not include the fourth nominal *Coptodon* species in the lake, *C.*  
471 *nigrans*, but extreme phenotypic similarity to *C. deckerti* (Dunz and Schliewen, 2010) and our  
472 inability to identify or distinguish these individuals in field collections and observations (Martin  
473 2012, 2013) suggests a close relationship between *C. deckerti* and this nominal species, which  
474 would not change this inference. It thus appears that during the large majority of the time that the

475 *Coptodon* lineage was present in Lake Ejagham, no diversification occurred. One possibility is that  
476 earlier speciation events did occur, but were followed by extinction. While we cannot fully exclude  
477 this scenario, there are no indications for environmental disruptions such as major changes in  
478 water chemistry or depth during the history of Lake Ejagham (Stager et al., 2017).

479 Assuming that the divergence of *C. fusiforme* was the first within this radiation, a striking  
480 difference emerges between the waiting time to the first (7.74 ka) and the next two speciation  
481 events, which both occurred within 1.20 ka. The opposite pattern, a slowing speciation rate, would  
482 be expected if speciation followed a niche-filling model of ecological opportunity in the lake. At least  
483 two non-mutually exclusive explanations may account for this counterintuitive result.

484 First, an initial lack of ecological opportunity in young Lake Ejagham may have prevented a rapid  
485 first speciation event. Our results are reminiscent of those for sympatrically speciating Tristan da  
486 Cunha buntings (Ryan et al., 2007), where, as discussed by Grant and Grant (2009), the ancestral  
487 branch is considerably longer than those of the extant species. Grant and Grant (2009) propose  
488 that plants that constitute one of the niches used by the extant finch species may have arrived only  
489 recently. Similarly, ecological diversity in lower trophic levels in the lake may have been insufficient  
490 to generate the necessary degree of disruptive selection to drive divergence. For instance,  
491 *Daphnia* never colonized another Cameroon crater lake, Barombi Mbo, during its ca. 1 million year  
492 existence (Cornen et al., 1992; Green and Kling, 1988).

493 Second, genetic variation for traits underlying sexual and ecological selection and the associated  
494 genetic architecture may initially not have been conducive to speciation. If ecological and mate  
495 preference traits are distinct (i.e. not magic traits: Servedio et al., 2011) and independently  
496 segregating within the ancestral colonizing population, sympatric speciation models predict that  
497 there will be a waiting time associated with the initial buildup of linkage disequilibrium between  
498 these traits before sympatric divergence can proceed (Dieckmann and Doebeli, 1999; Kondrashov  
499 and Kondrashov, 1999). Furthermore, Bolnick (2004) demonstrated that under conditions where  
500 genetic variation for stringent assortative mating is limiting and females are penalized for  
501 assortative mating, sympatric speciation may require a long time. In this light, it is particularly  
502 intriguing that introgression of a block containing eight olfactory receptor genes from *C. sp. Mamfé*,  
503 which are likely to be highly relevant for mate choice, were introgressed shortly prior to the first  
504 speciation event. Therefore, genetic variation brought in by riverine gene flow may have been  
505 necessary to initiate speciation among Lake Ejagham *Coptodon*.

## 506 *Conclusions*

507 We showed that Lake Ejagham was rapidly colonized by ancestors of the extant *Coptodon*  
508 radiation in a single major colonization, while also inferring low levels of ongoing and continuous  
509 secondary gene flow from riverine species into ancestral as well as extant lake species. Speciation  
510 can still be considered sympatric if secondary gene flow was present but did not play a causal role

511 in speciation, and the pattern of ongoing gene flow is consistent with this. However, introgression  
512 of a cluster of olfactory receptor genes into a pair of sister species (but not the third species) just  
513 prior to their divergence, indicates that secondary gene flow may have been important to  
514 speciation. The introgression of olfactory genes is particularly salient given that E jagham *Coptodon*  
515 species exhibit strong assortative mating, but currently weak disruptive selection, syntopic  
516 breeding territories, and no sexual dichromatism within a tiny, shallow lake.



## 517 **Methods**

### 518 *Sampling*

519 Sampling efforts and procedures have been described previously in Martin et al. (2015a). Here, we  
520 sampled breeding individuals displaying reproductive coloration from three species of *Coptodon*  
521 (formerly *Tilapia*) that are endemic to Lake Ejagham in Cameroon: *Coptodon fusiforme* (n = 3), *C.*  
522 *deckerti* (n = 2), and *C. ejagham* (n = 2). We additionally used samples from closely related riverine  
523 species from the nearby Cross River whose ancestors likely colonized Lake Ejagham: *C.*  
524 *guineensis* (n = 2) at Nguti, 65 km from Lake Ejagham, and an undescribed taxon, *C. sp. "Mamfé"*  
525 (Keijman, 2010) (n = 1), at Mamfé, 37 km from Lake Ejagham. Finally, we sampled a closely  
526 related outgroup species, *C. kottae*, from crater lake Barombi ba Kotto (145 km from Lake  
527 Ejagham), and a distantly related outgroup species, *Sarotherodon galilaeus* (n = 3), from the Cross  
528 River at Mamfé. Cichlids were caught by seine or cast-net in 2010 and euthanized in an overdose  
529 of buffered MS-222 (Finquel, Inc.) following approved protocols from University of California, Davis  
530 Institutional Animal Care and Use Committee (#17455) and University of North Carolina Animal  
531 Care and Use Committee (#15-179.0), and stored in 95-100% ethanol or RNAlater in the field.

### 532 *Genome sequencing and variant calling*

533 DNA was extracted from muscle tissue using DNeasy Blood and Tissue kits (Qiagen, Inc.) and  
534 quantified on a Qubit 3.0 fluorometer (ThermoFisher Scientific, Inc.). Genomic libraries were  
535 prepared using the automated Apollo 324 system (WaterGen Biosystems, Inc.) at the Vincent J.  
536 Coates Genomic Sequencing Center (QB3). Samples were fragmented using Covaris sonication,  
537 barcoded with Illumina indices, and quality checked using a Fragment Analyzer (Advanced  
538 Analytical Technologies, Inc.). Nine to twelve samples were pooled in four different libraries for  
539 150PE sequencing on four lanes of an Illumina HiSeq4000.

540 We mapped raw sequencing reads in fastq format to the *Oreochromis niloticus* genome assembly  
541 (version 1.1, [https://www.ncbi.nlm.nih.gov/assembly/GCF\\_000188235.2/](https://www.ncbi.nlm.nih.gov/assembly/GCF_000188235.2/), Brawand et al., 2014)  
542 with BWA-MEM (version 0.7.15, Li, 2013). Using Picard Tools (version 2.10.3,  
543 <http://broadinstitute.github.io/picard>), the resulting .sam files were sorted (*SortSam* tool), and the  
544 resulting .bam files were marked for duplicate reads (*MarkDuplicates* tool) and indexed  
545 (*BuildBamIndex* tool). SNPs were called using the HaplotypeCaller program in the Genome  
546 Analysis Toolkit (GATK; DePristo et al., 2011), following the GATK Best Practices guidelines (Van  
547 der Auwera et al., 2013), <https://software.broadinstitute.org/gatk/best-practices/>). Since no high-  
548 quality known variants are available to recalibrate base quality and variant scores, SNPs were  
549 called using hard filtering in accordance with the GATK guidelines (DePristo et al., 2011; Van der  
550 Auwera et al., 2013): QD < 2.0, MQ < 40.0, FS > 60.0, SOR > 3.0, MQRankSum < -12.5,  
551 ReadPosRankSum < -8.0. SNPs that did not pass these filters were removed from the resulting  
552 VCF files using vcfutils (version 0.1.14, Danecek et al., 2011, using "--remove-filtered-all" flag), as

553 were SNPs that differed from the reference but not among focal samples (using “max-non-ref-af  
554 0.99” in vcftools) and SNPs with more than two alleles (using “-m2 -M2” flags in bcftools, version  
555 1.5 (Li, 2011)). Genotypes with a genotype quality below 20 and depth below 5 were set to missing  
556 (using “--minGQ” and “--minDP” flags in vcftools, respectively), and sites with more than 50%  
557 missing data were removed (using “--max-missing” flag in vcftools). Our final dataset consisted of  
558 15,523,738 SNPs with a mean sequencing depth of 11.82 (range: 7.20 – 16.83) per individual.

### 559 *Phylogenetic trees, networks, and genetic structure*

560 We employed several approaches to estimate relationships among the three species in the  
561 *Coptodon* Ejagham radiation and the two riverine *Coptodon* taxa. These analyses were repeated  
562 for four outgroup configurations: no outgroup (unrooted trees), using only *C. kottae*, only *S.*  
563 *galilaeus*, and both *C. kottae* and *S. galilaeus* as outgroups. Only sites with less than 10% missing  
564 data were used for phylogenetic reconstruction.

565 Using the GTR-CAT maximum likelihood model without rate heterogeneity, as implemented in  
566 RaxML (version 8.2.10, Stamatakis, 2014), we inferred phylogenies for all SNPs concatenated, as  
567 well as separately for each 100kb window with at least 250 variable sites (“gene trees”). This  
568 resulted in sets of 1,532 – 2,559 trees, depending on the outgroup configuration.

569 Next, rooted gene trees were used, first, to compute Internode Confidence All (ICA) scores  
570 (Salichos et al., 2014), using the “-L MR” flag in RaXML) for each of the nodes of the whole-  
571 genome trees. Rooted gene trees were also used to construct species trees in Phylonet (version  
572 3.6.1, Than et al., 2008) using the Minimize Deep Coalescence criterion (Than and Nakhleh, 2009,  
573 “Infer\_ST\_MDC” command) and maximum likelihood (“Infer\_Network\_ML” command with zero  
574 reticulations), and using a maximum pseudo-likelihood method implemented in MP-EST (version  
575 1.5, Liu et al., 2010). Finally, we used ASTRAL (version 2.5.5, Mirarab et al., 2014) to infer species  
576 trees from unrooted gene trees.

577 To visualize patterns of genealogical concordance and discordance, we computed a phylogenetic  
578 network using the NeighborNet method (Bryant and Moulton, 2004) implemented in Splitstree  
579 (version 4.14.4, Huson and Bryant, 2006), using all SNPs.

580 We used the machine learning program *Saguaro* (Zamani et al., 2013) to determine the dominant  
581 topology across the genome and calculate the percentages of the genome that supported specific  
582 relationships, such as monophyly of the Ejagham *Coptodon* radiation. *Saguaro* combines a hidden  
583 Markov model with a self-organizing map to characterize local phylogenetic relationships among  
584 individuals without requiring a priori hypotheses about the relationships. This method infers local  
585 relationships among individuals in the form of genetic distance matrices and assigns segments  
586 across the genomes to these topologies. These genetic distance matrices can then be transformed  
587 into neighborhood joining trees to visualize patterns of evolutionary relatedness across the  
588 genome. To be comprehensive in our search, we allowed *Saguaro* to propose 31 topologies for the

589 genome, but otherwise applied default parameters. We investigated the effect of the number of  
590 proposed topologies on the proportion of genomes assigned to our two categories, and found that  
591 the percentages were robust after 20 proposed topologies, with increasingly smaller percentages  
592 of the genome being assigned to new additional topologies.

### 593 *Genome-wide tests for admixture*

594 We tested for admixture between the two riverine species and the three Lake Ejagham species  
595 using several statistics based on patterns of derived allele sharing among these species. We used  
596 the ADMIXTOOLS (version 4.1, Patterson et al., 2012) suite of programs to compute four-taxon D-  
597 statistics (“ABBA-BABA tests”, *qpDstat* program) and a five-taxon  $f_d$ -ratio test (*qpF4ratio* program),  
598 and the software dfoil (release 2017-06-14, <http://www.github.com/jbpease/dfoil>, Pease and Hahn,  
599 2015) to compute five-taxon  $D_{\text{FOIL}}$  statistics. For all analyses, we used *S. galilaeus* as the outgroup  
600 species.

601 Given a topology (((P1, P2), P3), O), *D* can identify admixture between either P1 or P2 on one  
602 hand, and P3 on the other based on the relative occurrence of ABBA and BABA patterns. First, we  
603 computed D-statistics to test for admixture between *C. guineensis* (P1) or *C. sp. Mamfé* (P2) and  
604 any Lake Ejagham species (P3). Given that all three of these comparisons indicated admixture  
605 between *C. sp. Mamfé* and Lake Ejagham species (Fig 3A), we next tested whether there was  
606 evidence for differential admixture from *C. sp. Mamfé* among the three Ejagham *Coptodon*  
607 species, using the three possible pairs of Lake Ejagham species as P1 and P2, and *C. sp. Mamfé*  
608 as P3.

609 Another way to test for differential *C. sp. Mamfé* admixture among Ejagham *Coptodon* species is  
610 by using  $f_d$ -ratio tests, wherein taxon “X” is considered putatively admixed, containing ancestry  
611 proportion  $\alpha$  from the branch leading to P2 (after its divergence from taxon P1), and ancestry  
612 proportion  $\alpha - 1$  from the branch leading to taxon P3. Given the constraints imposed by the  
613 topology of our phylogeny, we could only test for admixed ancestry of either *C. deckerti* or *C.*  
614 *ejagham* with *C. sp. Mamfé*, after divergence of the *C. deckerti* – *C. ejagham* ancestor from *C.*  
615 *fusiforme*. Testing for admixed ancestry of *C. fusiforme* using an  $f_d$ -ratio test would merely produce  
616 a lower bound of  $\alpha$  (see Mailund, 2014), while we were instead interested in an estimate or upper  
617 bound on  $\alpha$ , since our null hypothesis was  $\alpha = 1$ : *C. fusiforme* has ancestry only from the *C.*  
618 *deckerti* – *C. ejagham* ancestor.

619 The five-taxon  $D_{\text{FOIL}}$  statistics enable testing of the timing, and in some cases, direction of  
620 introgression in a symmetric phylogeny with two pairs of taxa with a sister relationship within the  
621 provided phylogeny, and an outgroup. Given our six-taxon phylogeny, we performed this test for  
622 three sets of five species, each with a unique combination of two of the three Ejagham *Coptodon*  
623 species as one species pair (P1 and P2), and *C. guineensis* and *C. sp. Mamfé* as the second  
624 species pair (P3 and P4; the outgroup again being *S. galilaeus*). The test involves the computation

625 of four  $D_{\text{FOIL}}$  statistics ( $D_{\text{FO}}$ ,  $D_{\text{IL}}$ ,  $D_{\text{FI}}$ , and  $D_{\text{OL}}$ ), each essentially performing a three-taxon  
626 comparison. The combination of results for these statistics can inform whether introgression  
627 predominantly occurred among any of the four ingroup extant taxa, in which case the direction of  
628 introgression can also be inferred (e.g.  $P1 \rightarrow P3$ ), or among an extant taxon and the ancestor of  
629 the other species pair, in which case the direction of introgression cannot be inferred (e.g.  $P1 \leftrightarrow$   
630  $P3P4$ ). Unlike  $D$  and  $f_d$  statistics,  $D_{\text{FOIL}}$  statistics by default also include counts of patterns where  
631 only a single taxon has the derived allele (e.g. BAAAA), under the assumption of similar branch  
632 lengths across taxa. When this assumption is violated, the dfoil program can be run in “dfoilalt”  
633 mode, thereby excluding single derived-allele counts (Pease and Hahn, 2015). Since we observed  
634 significantly fewer single derived-allele sites for *C. sp. Mamfé* than for *C. guineensis*, we ran the  
635 dfoil program in “dfoilalt” mode at a significance level of 0.001.

### 636 *Inference of demographic history with G-PhoCS*

637 For a detailed reconstruction of the demographic history of Ejagham *Coptodon* and the two closely  
638 related riverine species, we used the program G-PhoCS (Generalized Phylogenetic Coalescent  
639 Sampler, version 1.3, Gronau et al., 2011). G-PhoCS implements a coalescent-based approach  
640 using Markov chain Monte Carlo (MCMC) to jointly infer population sizes, divergence times, and  
641 optionally migration rates among extant as well as ancestral populations, given a predefined  
642 population phylogeny. To infer migration rates, one or more unidirectional migration bands can be  
643 added to the model, each between a pair of populations that overlap in time. G-PhoCS can thus  
644 infer the timing of migration within the bounds presented by the population splits in the phylogeny.

645 As input, G-PhoCS expects full sequence data for any number of loci. Since G-PhoCS models the  
646 coalescent process without incorporating recombination, it assumes no recombination within loci,  
647 and free recombination between loci. Following several other studies (Choi et al., 2017; Gronau et  
648 al., 2011; Hung et al., 2014; McManus et al., 2015), we picked 1 kb loci separated by at least 50  
649 kb. Following (Gronau et al., 2011), loci were selected not to contain the following classes of sites  
650 within the *O. niloticus* reference genome – that is, rather than being simply masked, these sites  
651 were not allowed to occur in input loci: (1) hard-masked (N) or soft-masked (lowercase bases) sites  
652 in the publicly available genome assembly; (2) sites that were identified to be prone to ambiguous  
653 read mapping using the program SNPable (Li, 2009, using  $k=50$  and  $r=0.5$  and excluding rankings  
654 0 and 1); and (3) any site within an exon or less than 500bp from an exon boundary. Furthermore,  
655 loci were chosen to contain no more than 25% missing data (uncalled and masked genotypes).  
656 Using these selection procedures, a total of 2,618 loci were chosen using custom scripts and a  
657 VCF to Fasta conversion tool (Bergey, 2012).

658 Prior distributions for demographic parameters are specified in G-PhoCS using  $\alpha$  and  $\beta$  parameters  
659 of a gamma distribution. We determined the mean of the prior distribution ( $\alpha / \beta$ ) for each  
660 parameter using a number of preliminary runs, while keeping the variance ( $\alpha / \beta^2$ ) large following  
661 (Gronau et al., 2011) to minimize the impact of the prior on the posterior (see S9 Table for all G-

662 PhoCS settings). Preliminary runs confirmed that regardless of the choice of the prior mean,  
663 MCMC runs converged on similar posterior distributions.

664 For each combination of migration bands (see below), we performed four replicate runs. Each G-  
665 PhoCS run was allowed to continue for a week on 8-12 cores on a single 2.93 GHz compute node  
666 of the UNC Killdevil computing cluster, resulting in runs with 1-1.5 million iterations. The first  
667 250,000 iterations were discarded as burn-in, and the remaining iterations were sampled 1 in every  
668 50 iterations. Convergence, stationarity, and mixing of MCMC chains was assessed using Tracer  
669 (version 1.6.0, Rambaut et al., 2014).

670 Because the total number of possible migration bands in a six-taxon phylogeny is prohibitively high  
671 for effective parameter inference, we took the following strategy. Our primary focus was on testing  
672 migration bands from *C. sp. Mamfé* (“Mam”) and *C. guineensis* (“Gui”) to the Lake Ejagham  
673 *Coptodon* species and their ancestors: *C. deckerti* (“Dec”), *C. ejagham* (“Eja”), *C. fusiforme* (“Fus”),  
674 “DE” (the ancestor to Dec and Eja), and “DEF” (the ancestor to DE and Fus). We first performed  
675 runs each with a single one of these migration bands. Since all migration bands from *C. sp. Mamfé*  
676 had non-zero migration rates, we next performed runs with all of these migration bands at once.  
677 However, in those runs we observed failures to converge, higher variance in parameter estimates,  
678 and the dropping to zero of rates of migration to the ancestral Lake Ejagham lineage (see Fig 4).  
679 The latter is surprising given that for single-band runs, this migration rate was the highest inferred,  
680 and is also in sharp contrast to other analyses that show much stronger support for migration to the  
681 ancestral lineage than to extant species. While we suspect that runs with all migration bands have  
682 poor performance due to the number of parameters, runs with single migration bands may be  
683 prone to overestimation of the migration rate. We therefore also performed runs with migration  
684 bands either to all three extant species or to both ancestral lineages, and report results for all of  
685 these run types, separately.

686 Finally, we performed runs with no migration bands. We did not examine models with migration  
687 from the Ejagham radiation to neighboring rivers because this is not relevant to sympatric  
688 speciation scenarios in this lake.

689 To convert the  $\theta$  ( $4 * N_e * \mu$ ) and  $\tau$  ( $T * \mu$ ) parameters reported by G-PhoCS, which are scaled by  
690 the mutation rate, to population sizes  $N_e$  and divergence times  $T$ , we used a per year mutation rate  
691  $\mu$  of  $7.5 * 10^{-9}$ , based on a per-generation mutation rate of  $7.5 * 10^{-9}$  (Guo et al., 2013) and a  
692 generation time of 1 year similar to East African cichlids and corresponding to observations of  
693 laboratory growth rates (although note that these species have never been bred in captivity). We  
694 converted the migration rate parameter  $m$  for a given migration band to several more readily  
695 interpretable statistics. First, the population migration rate ( $2Nm$ ) is twice the number of migrants in  
696 the source population that arrived by migration from the target population, per generation. It is  
697 calculated using the value of  $\theta$  for the target population ( $2Nm_{s \rightarrow t} = m_{s \rightarrow t} * \theta_t / 4$ ), and as such it does  
698 not depend on an estimate of the mutation rate. Second, the proportion of migrants per generation

699 is calculated by multiplying  $m$  by the mutation rate. Third, the “total migration rate”  $M$  (Gronau et al.,  
700 2011) can be interpreted as the probability that a locus in the target population has experienced  
701 migration from the source population, and is calculated by multiplying  $m$  by the time span of the  
702 migration band, which is the time window during which both focal populations existed ( $M_{s \rightarrow t} = m_{s \rightarrow t}$   
703 \*  $T_{s,t}$ ).

#### 704 *Local admixture tests*

705 To identify genomic regions with evidence for admixture between one of the riverine species and  
706 one or more of the Lake Ejagham species, we first computed the  $f_d$  statistic (Martin et al., 2015b)  
707 along sliding windows of 50 kb with a step size of 5 kb, using ABBABABA.py (Martin, 2015). The  $f_d$   
708 statistic is a modified version of the Green et al. (2010) estimator of the proportion of introgression  
709 ( $f$ ), and has been shown to outperform  $D$  for the detection of introgression in small genomic  
710 windows (Martin et al., 2015b).

711 In the topology ((P1, P2), P3), O),  $f_d$  tests for introgression between P2 and P3. For each window,  
712  $f_d$  was calculated for two types of configurations. First, those that can identify the source of any  
713 riverine admixture, using the two riverine species as P1 and P2 and a Lake Ejagham species as  
714 P3 (for example: P1 = *C. guineensis*, P2 = *C. sp. Mamfé*, P3 = *C. ejagham*). Second, those that  
715 can identify differential admixture from a riverine species among two Lake Ejagham species (for  
716 example: P1 = *C. deckerti*, P2 = *C. ejagham*, P3 = *C. sp. Mamfé*). Since  $f_d$  only detects  
717 introgression between P2 and P3,  $f_d$  was also computed for every triplet with P1 and P2 swapped.

718 P-values for  $f_d$  were estimated by Z-transforming single-window  $f_d$  values based on a standard  
719 normal distribution, followed by multiple testing correction using the false discovery rate method  
720 (FDR, Benjamini and Hochberg, 1995), using a significance level of 0.05. Next, putative admixture  
721 blocks were defined by combining runs of significant  $f_d$  values that were consecutive or separated  
722 by at most three non-significant (FDR > 0.05) windows. Because any secondary admixture must  
723 have occurred within the last ~10k years, after colonization of Lake Ejagham, true admixture  
724 blocks are expected to be large, and blocks of less than five total windows or with maximum  $f_d$   
725 values below 0.5 were excluded from consideration. Therefore, only genomic scaffolds of at least  
726 70 kb (i.e., 557 scaffolds or 97.40% of the assembled genome) can harbor a putative admixture  
727 block. Blocks indicating differential admixture with a riverine species among two Lake Ejagham  
728 species (in ingroup triplets with a pair of Lake Ejagham species as P1 and P2, and a riverine  
729 species as P3) were retained only when the riverine source of admixture could be distinguished in  
730 a direct comparison, by intersection with blocks indicating differential admixture with a Lake  
731 Ejagham species among the two riverine species. For instance, a block indicating admixture  
732 between *C. deckerti* (P2) and *C. sp. Mamfé* (P3) in an ingroup triplet with *C. ejagham* as P1 (i.e.,  
733 identifying differential admixture among two lake species) was only retained if it overlapped with an  
734 admixture block with *C. guineensis* as P1, *C. sp. Mamfé* as P2, and *C. deckerti* as P3 (i.e.  
735 identifying differential admixture among the riverine sources with the same lake species).

736 Putative admixture blocks as defined by  $f_d$  values were validated and aged using HybridCheck  
737 (Ward and van Oosterhout, 2016), using the same mutation rate as for our G-PhoCS analysis.  
738 HybridCheck identifies blocks that may have admixed between two sequences by comparing  
739 sequence similarity between triplets of individuals along sliding windows, and next estimates, for  
740 each block, the coalescent time between the two potentially admixed sequences. While  
741 HybridCheck can also discover admixture blocks *ab initio*, we employed it to test user defined  
742 blocks with the “addUserBlock” method. Given that HybridCheck accepts triplets of individuals, and  
743  $f_d$  blocks detected in a given species triplet were tested twice in HybridCheck for that species  
744 triplet, each using a different individual of the admixed Lake Ejagham species. Blocks were  
745 retained when HybridCheck reported admixture between the same pair of individuals as the  $f_d$   
746 statistic, and with a p-value smaller than 0.001 for both triplets of individuals. Our final set of “likely  
747 blocks” consisted of those with an estimated age smaller than the G-PhoCS point estimate (in runs  
748 with all possible migration bands from *C. sp. Mamfé*) of the divergence time between the Lake  
749 Ejagham ancestor (“DEF”) and the riverine ancestor (“AU”), while “high confidence blocks” were  
750 defined as those with the *upper* bound of the 95% confidence interval of the age estimate smaller  
751 than the *lower bound* of the 95% HPD of the divergence time estimate between DEF and AU (for  
752 whichever set of G-PhoCS runs, either with no, some, or all migration bands from *C. sp. Mamfé*,  
753 had the lowest value for this parameter).

754 In order to characterize the patterns of admixture for these pairwise admixture blocks further, we  
755 calculated localized  $D_{\text{FOIL}}$  statistics for each. Since these statistics depend on the occurrence of  
756 sufficient numbers of all possible four-taxon derived allele frequency occurrence patterns among  
757 five taxa, these only produced results for a subset of blocks (for the same reason, we were not  
758 able to use these statistics for *ab initio* admixture block discovery along sliding windows). Since we  
759 already established the presence of admixture for these blocks, and performed these analyses to  
760 determine the pattern of admixture, we did not require significance for each  $D_{\text{FOIL}}$  statistic, but also  
761 considered it to be positive or negative if the statistic was more than half its maximum value and  
762 had at least 10 informative sites.

### 763 *Gene Ontology for admixture blocks*

764 We assessed whether “high confidence” admixture blocks were enriched for specific gene  
765 categories using Gene Ontology (GO) analyses. Entrez Gene gene identifiers were extracted by  
766 intersecting the genomic coordinates of admixture blocks with a GFF file containing the genome  
767 annotation for *O. niloticus* (Annotation Release 102, available at  
768 [https://www.ncbi.nlm.nih.gov/genome/annotation\\_euk/Oreochromis\\_niloticus/102/](https://www.ncbi.nlm.nih.gov/genome/annotation_euk/Oreochromis_niloticus/102/)), and GO  
769 annotations for each gene were collected using the R/Bioconductor package biomaRt (Durinck et  
770 al., 2009). Next, GO enrichment analysis was carried out with the R/Bioconductor package goseq  
771 (Young et al., 2010), using a flat probability weighting function, the Wallenius method for calculating  
772 enrichment scores, and correcting p-values for multiple testing using the false discovery rate

773 method (FDR, Benjamni and Hochberg, 1995). GO terms were considered enriched for FDRs  
774 below 0.005.

775

776

### 777 **Acknowledgements**

778 This study was funded by a National Geographic Society Young Explorer's Grant, a Lewis and  
779 Clark Field Research grant from the American Philosophical Society, and the University of North  
780 Carolina at Chapel Hill to CHM. We gratefully acknowledge the Cameroonian government and the  
781 regional authority and village council of Eyumojock and surrounding communities for permission to  
782 conduct this research. We thank Cyrille Dening Touokong, Jackson Waite-Himmelwright, and  
783 Patrick Enyang for field assistance and Nono LeGrand Gonwuou for help obtaining permits.

784

### 785 **Data availability statement**

786 All sequencing data will be deposited in NCBI's Short Read Archive. Scripts and analyses output  
787 will be deposited in the Dryad Digital Repository.

788

### 789 **Funding**

790 This study was funded by a National Geographic Society Young Explorer's Grant, a Lewis and  
791 Clark Field Research grant from the American Philosophical Society, and the University of North  
792 Carolina at Chapel Hill to CHM.

793

### 794 **Competing interests**

795 The authors declare no competing interests.



796 **Figures and Tables**

797 Fig 1 – Map and species photos

798 Fig 2 – Phylogenies

799 Fig 3 – Genome-wide admixture statistics

800 Fig 4 – G-PhoCS results

801 Fig 5 – Admixture blocks

802 *Table 1 – G-PhoCS results*

803 *Table 2 – Enriched GO terms*

804 **Supplementary Figures and Tables**

805 S1 Fig – RaxML trees with different outgroup configurations

806 S2 Fig – Species trees

807 S3 Fig – Saguaro: two most common trees

808 S4 Fig – G-phoCS results: migration rates from *C. guineensis*, within-radiation migration

809 S5 Fig – Admixture block ages

810 S6 Fig – Lake Ejagham outlet stream

811 *S7 Table – Monophyly characteristics of each Saguaro tree*

812 *S8 Table – G-phoCS settings*

813 *S9 Table –  $f_d$  triplets for admixture blocks*

814 *S10 Table – Olfactory receptor genes*

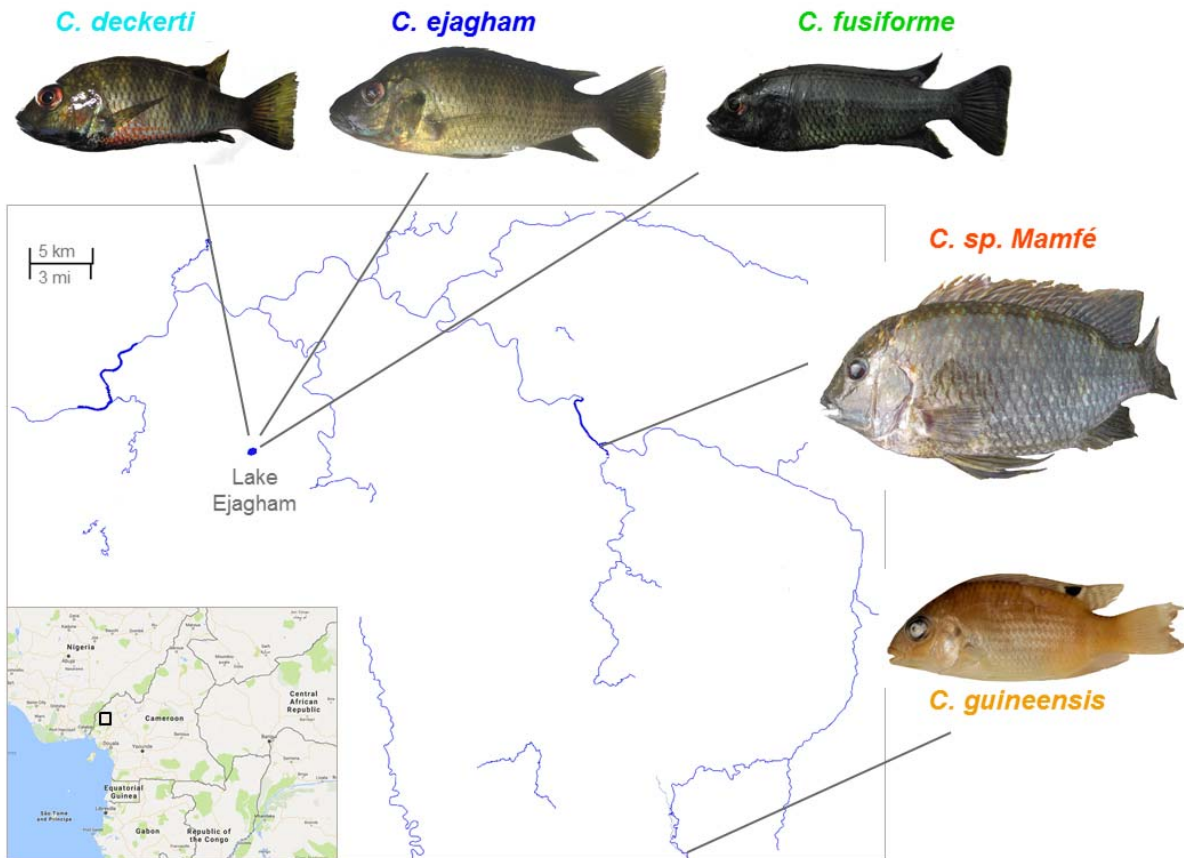

815

816 **Fig 1. Lake Ejagham and its surrounding rivers in western Cameroon.**

817 The focal species in this study are shown: three species of Lake Ejagham *Coptodon* and two closely  
818 related riverine species. As outgroups, we used *C. kottae*, a Cameroon crater lake endemic species that  
819 did not diversify, and *Sarotherodon galilaeus*.

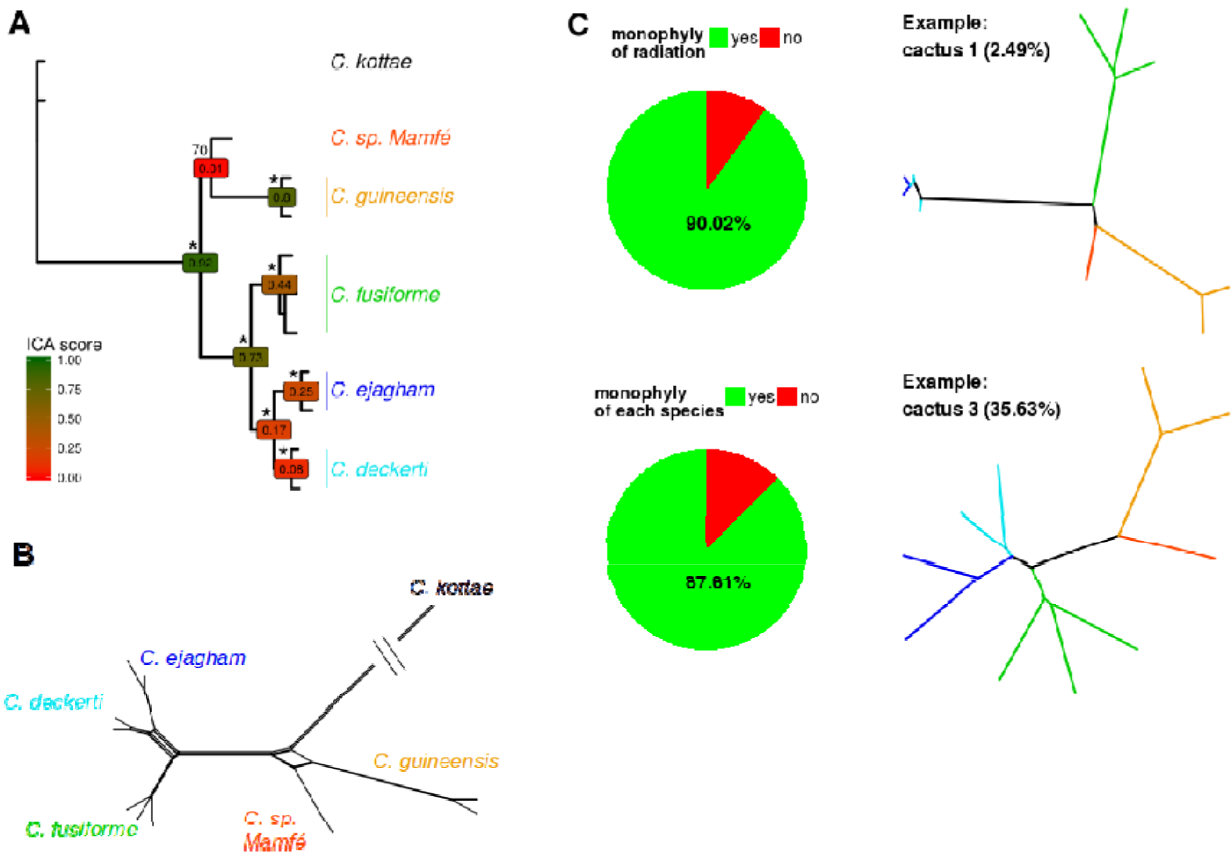

820 **Fig 2. Support for monophyly of the Lake Ejagham *Coptodon* radiation across the genome.**  
 821 **(A)** Maximum likelihood tree based on concatenated SNPs across the genome, with bootstrap support  
 822 (\* = 100% support), and ICA (Internode Confidence All) values based on ML gene trees for 100kb  
 823 windows. Support for the sister relationship between the riverine species *C. sp. Mamfé* and *C.*  
 824 *guineensis* is much lower than that for the monophyly of the three lake Ejagham species, *C. fusiforme*,  
 825 *C. ejagham*, and *C. deckerti*. **(B)** A phylogenetic network shows limited conflict along the branch leading  
 826 to lake Ejagham species and a rather clearly resolved topology within the radiation. In line with results  
 827 from panel A, more conflict is observed around the divergence of *C. sp. Mamfé* and *C. guineensis*. **(C)**  
 828 Local phylogenies (Saguaro “cacti”) indicate that along most of the genome, the Ejagham *Coptodon*  
 829 clade (top) is monophyletic and that individuals within the clade cluster by species (bottom).

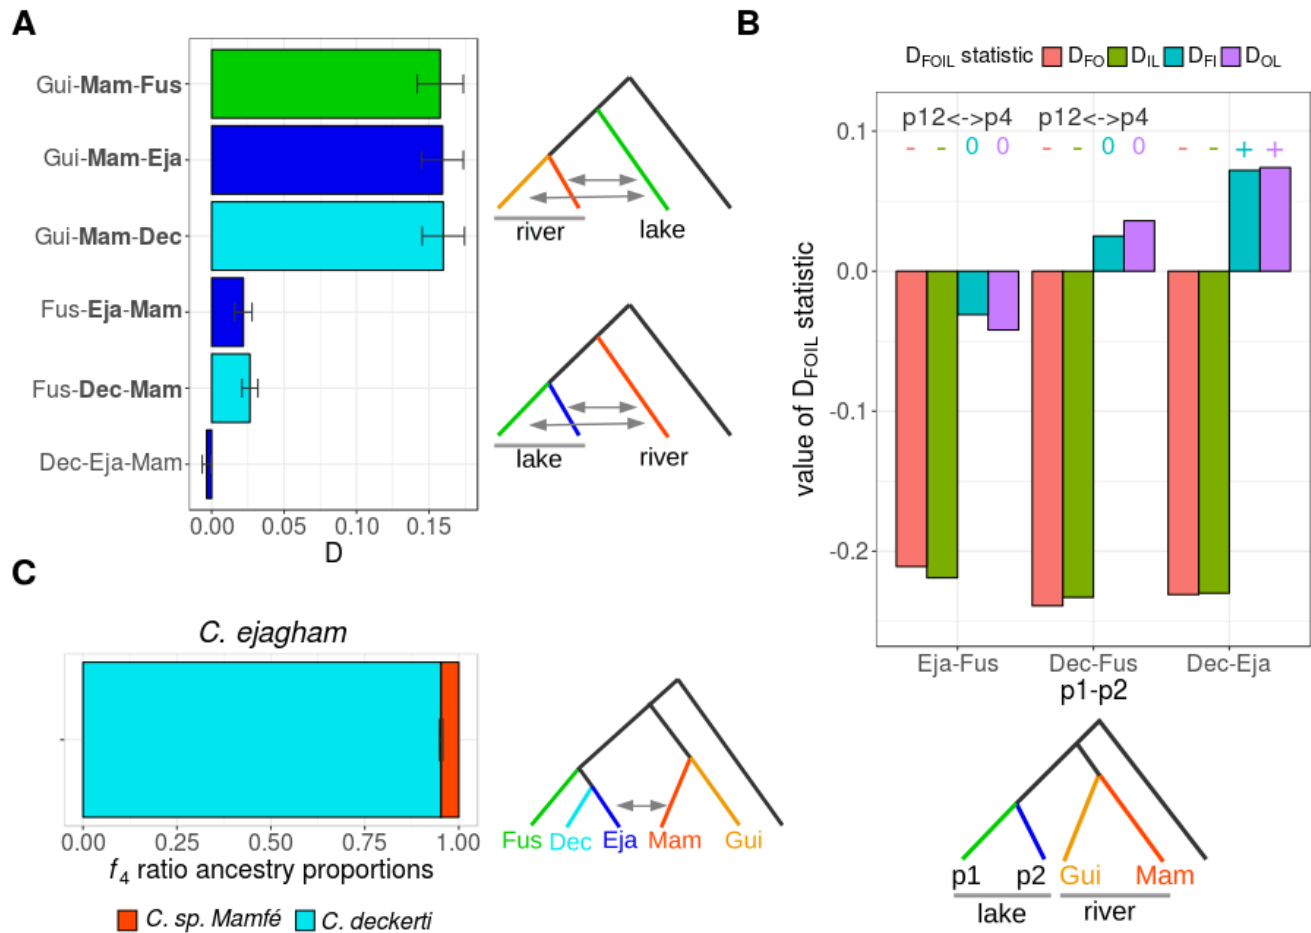

830 **Fig 3. Genome-wide admixture statistics suggest secondary riverine gene flow from *C. sp.***  
 831 ***Mamfé*.**

832 **(A)** D-statistics for several ingroup triplets indicate that all three Ejagham *Coptodon* species (“Fus”: *C.*  
 833 *fusiforme*, “Eja”: *C. ejagham*, “Dec”: *C. deckerti*) experienced admixture with *C. sp. Mamfé* (“Mam”), at  
 834 similar levels relative to *C. guineensis* (“Gui”), as shown by the top three bars. The lower three bars  
 835 show the much weaker evidence for differential *C. sp. Mamfé* admixture among Ejagham *Coptodon*  
 836 species. Species between which admixture is inferred (significant D-statistics) are denoted in bold. **(B)**  
 837  $D_{FOIL}$  statistics for the three combinations of two Ejagham *Coptodon* species show a preponderance of  
 838 ancestral gene flow with *C. sp. Mamfé*. Negative  $D_{FO}$  and  $D_{IL}$  in combination with non-significant  $D_{FI}$  and  
 839  $D_{OL}$  statistics, as for the first two comparisons, indicate ancestral gene flow, while the pattern for the  
 840 third combination does not have a straightforward interpretation, although it is qualitatively similar to the  
 841 first two comparisons. **(C)** An  $f_4$ -ratio test for differential *C. sp. Mamfé* admixture between *C. ejagham*  
 842 and *C. deckerti* indicates that *C. ejagham* has experienced 4.7% additional admixture from *C. sp.*  
 843 *Mamfé*.

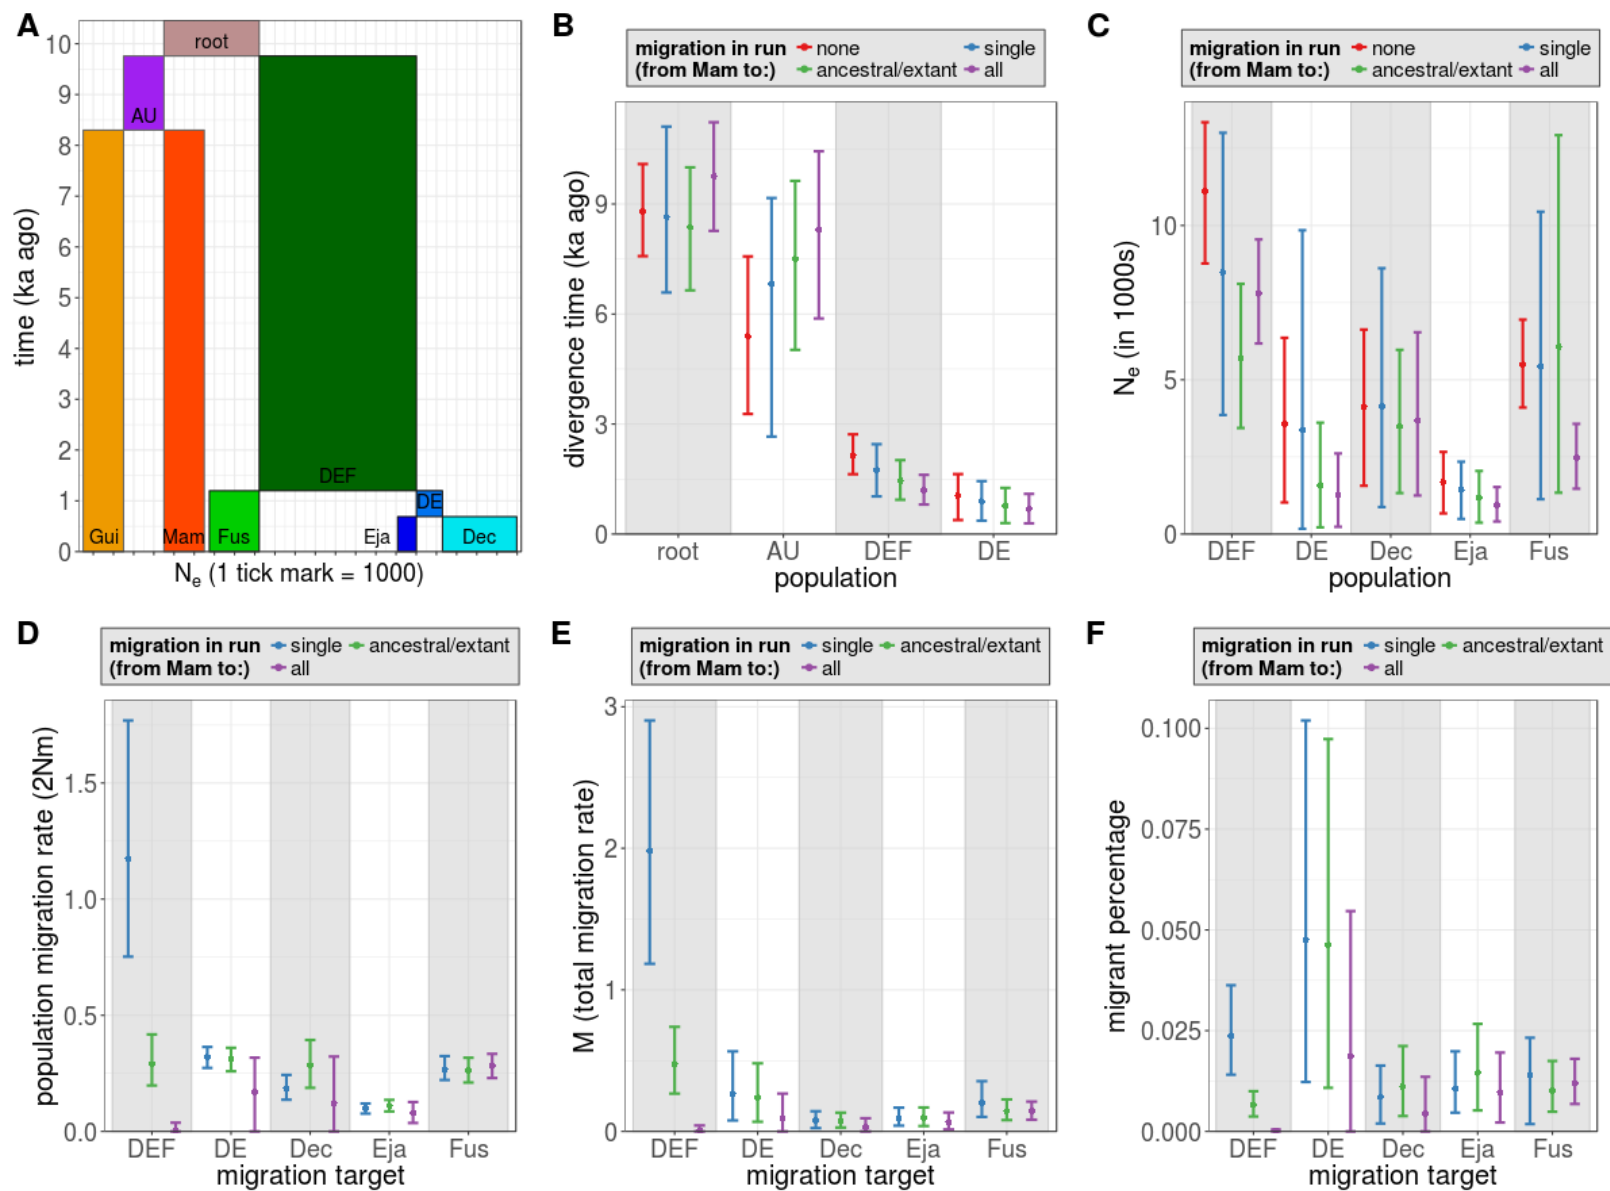

845 **Fig 4. A comprehensive picture of the demographic speciation history of *Coptodon Ejagham*.**  
846 **(A)** Overview of the divergence times and population sizes inferred by G-PhoCS. Box widths (x-axis) correspond to population sizes only for Lake Ejagham  
847 lineages: *C. deckerti* (“Dec”), *C. ejagham* (“Eja”), *C. fusiforme* (“Fus”), the ancestor of Dec and Eja (“DE”), and the ancestral Ejagham lineage (“DEF”). **(B-F)**  
848 Estimates of divergence times (B), population sizes (C), and migration rates (D-F) across runs with varying migration bands from *C. sp. Mamfé* to lake  
849 lineages: “none”, “single”, “ancestral/current”, and “all” indicate that individual runs estimated zero, one, several (either to the two ancestral lineages, DE and  
850 DEF, or to the three extant species), or all possible migration bands, respectively.

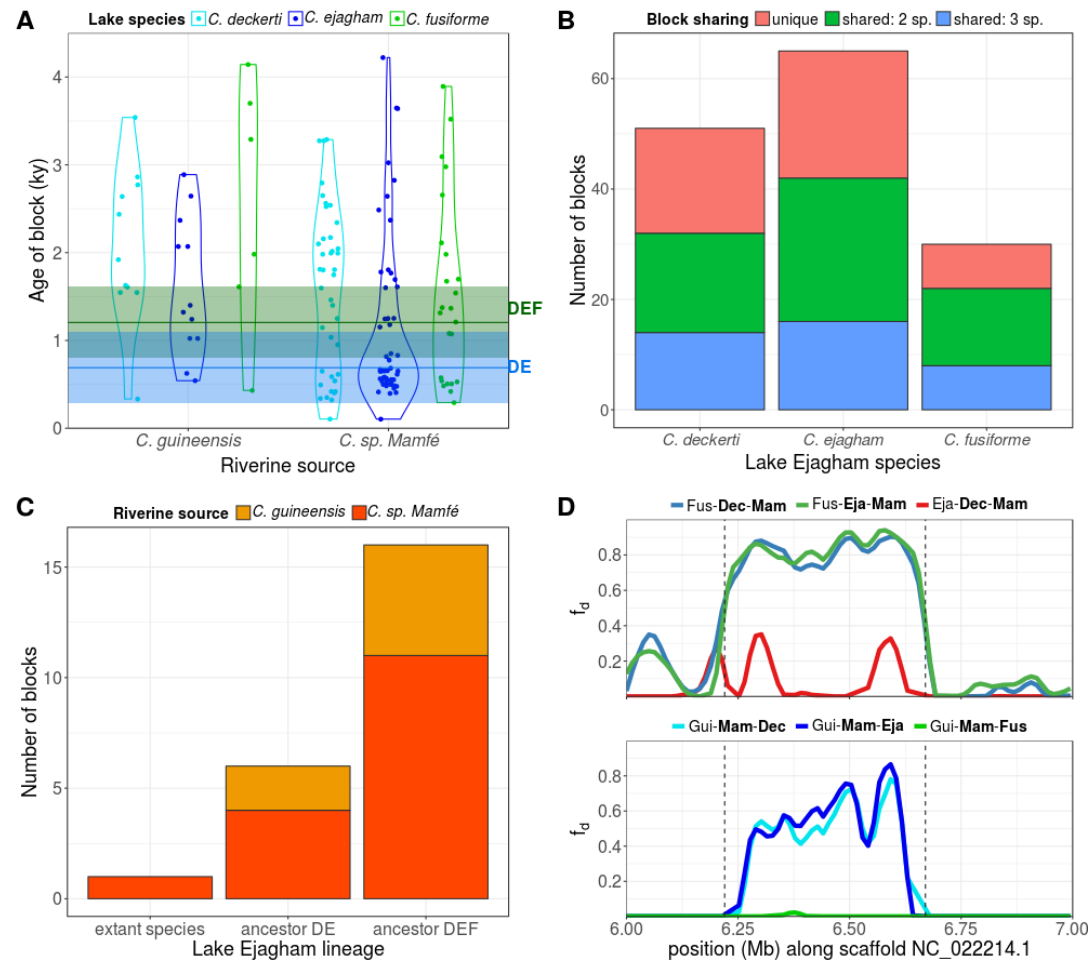

851 **Fig 5. Evidence for introgression from admixture blocks.**

852 Only “high-confidence” admixture blocks, that is with a maximum estimated age younger than minimum estimated divergence time of Ejagham *Coptodon* are  
 853 shown. **(A)** Age estimates of admixture blocks show ongoing introgression. Estimated divergence times of *C. deckerti* and *C. ejagham* (blue line DE), and of  
 854 *C. fusiforme* and the DE ancestor (green line DEF), and the corresponding 95% HPD intervals, are also shown. **(B)** Both unique and shared (either among  
 855 two or three species) admixture blocks are detected, and fewest blocks are detected in *C. fusiforme*. **(C)** A subset of blocks could be categorized using  
 856 DFOIL statistics, the large majority of which introgressed to the ancestral Ejagham lineage (“ancestor DEF”). **(D)** An example of an admixture block, which is  
 857 shared between *C. deckerti* and *C. ejagham*, and estimated by HybridCheck to have been introgressed 2,486 (1,651-3,554) years ago.

858 **Table 1. Summary of G-PhoCS parameter estimates.**

859 Divergence time  $\tau$  represents the estimated time that the named lineage split into its daughter lineage (see Fig, 4A). All migration rates are from migration  
 860 from *C. sp. Mamfé* to Lake Ejagham lineages. Parameter estimates are given separately for runs with no migration (“none”), with a single migration band  
 861 (“single”), with migration bands to either both ancestral or all three extant lineages (“anc/ext”), or to all Lake Ejagham lineages.  
 862 “ $\tau$ ” - divergence time; “2Nm” – population migration rate; “M (total)” – total migration rate; “% migrants” – percentage of migrants received in each generation;  
 863 “AU” - ancestor of *C. sp. Mamfé* and *C. guineensis*; “DEF” – ancestor of all three lake Ejagham species; “DE” – ancestor of *C. deckerti* and *C. ejagham*; Dec  
 864 – “*C. deckerti*”; “Eja” – *C. Ejagham*; “Fus” – *C. fusiforme*.

865

| parameter  | lineage | mean<br>single | mean<br>anc/ext | mean<br>all | mean<br>none | 95% HPD<br>single | 95% HPD<br>anc/ext | 95% HPD<br>all | 95% HPD<br>none |
|------------|---------|----------------|-----------------|-------------|--------------|-------------------|--------------------|----------------|-----------------|
| $\tau$     | root    | 8,649          | 8,369           | 9,760       | 8,803        | 6,587-11,112      | 6,647-10,001       | 8,267-11,229   | 7,579-10,090    |
| $\tau$     | AU      | 6,823          | 7,498           | 8,298       | 5,393        | 2,658-9,163       | 5,024-9,631        | 5,880-10,438   | 3,275-7,571     |
| $\tau$     | DEF     | 1,740          | 1,454           | 1,205       | 2,150        | 1,027-2,451       | 936-2,015          | 806-1,616      | 1,633-2,721     |
| $\tau$     | DE      | 892            | 778             | 689         | 1,049        | 365-1,443         | 300-1,259          | 291-1,096      | 3,83-1,635      |
| $N_e$      | DEF     | 8,482          | 5,714           | 7,794       | 11,121       | 3,857-13,001      | 3,435-8,109        | 6,175-9,545    | 8,768-13,343    |
| $N_e$      | DE      | 3,373          | 1,589           | 1,288       | 3,574        | 171-9,846         | 216-3,608          | 235-2,613      | 1,025-6,358     |
| $N_e$      | Dec     | 4,133          | 3,500           | 3,681       | 4,128        | 874-8,615         | 1,328-5,967        | 1,250-6,539    | 1,566-6,625     |
| $N_e$      | Eja     | 1,425          | 1,180           | 933         | 1,684        | 489-2,343         | 371-2,044          | 406-1,525      | 670-2,662       |
| $N_e$      | Fus     | 5,432          | 6,069           | 2,474       | 5,488        | 1,131-10,444      | 1,342-12,925       | 1,469-3,572    | 4,100-6,946     |
| 2Nm        | DEF     | 1.18           | 0.29            | 0.01        | NA           | 0.75-1.77         | 0.2-0.42           | 0-0.04         | NA              |
| 2Nm        | DE      | 0.32           | 0.31            | 0.17        | NA           | 0.27-0.36         | 0.26-0.36          | 0-0.32         | NA              |
| 2Nm        | Dec     | 0.19           | 0.28            | 0.12        | NA           | 0.14-0.24         | 0.19-0.39          | 0-0.32         | NA              |
| 2Nm        | Eja     | 0.10           | 0.11            | 0.08        | NA           | 0.08-0.12         | 0.09-0.14          | 0.04-0.13      | NA              |
| 2Nm        | Fus     | 0.27           | 0.26            | 0.28        | NA           | 0.22-0.32         | 0.21-0.32          | 0.23-0.33      | NA              |
| M (total)  | DEF     | 1.98           | 0.48            | 0.01        | NA           | 1.18-2.9          | 0.27-0.74          | 0-0.04         | NA              |
| M (total)  | DE      | 0.27           | 0.24            | 0.09        | NA           | 0.08-0.57         | 0.07-0.48          | 0-0.27         | NA              |
| M (total)  | Dec     | 0.08           | 0.07            | 0.03        | NA           | 0.02-0.14         | 0.03-0.13          | 0-0.09         | NA              |
| M (total)  | Eja     | 0.09           | 0.09            | 0.07        | NA           | 0.04-0.17         | 0.04-0.17          | 0.01-0.13      | NA              |
| M (total)  | Fus     | 0.20           | 0.14            | 0.14        | NA           | 0.1-0.35          | 0.08-0.23          | 0.08-0.21      | NA              |
| % migrants | DEF     | 1.39e-4        | 5.07e-5         | 7.03e-7     | NA           | 8.9e-5-2.1e-4     | 3.5e-5-7.3e-5      | 0-4.8e-6       | NA              |
| % migrants | DE      | 9.47e-5        | 1.96e-4         | 1.33e-4     | NA           | 8.1e-5-1.1e-4     | 1.6e-4-2.3e-4      | 0-2.5e-4       | NA              |
| % migrants | Dec     | 4.52e-5        | 8.11e-5         | 3.33e-5     | NA           | 3.3e-5-5.9e-5     | 5.4e-5-1.1e-4      | 0-8.8e-5       | NA              |
| % migrants | Eja     | 6.91e-5        | 9.45e-5         | 8.61e-5     | NA           | 5.4e-5-8.4e-5     | 7.3e-5-1.2e-4      | 3.9e-5-1.4e-4  | NA              |
| % migrants | Fus     | 4.94e-5        | 4.34e-5         | 1.14e-4     | NA           | 4.1e-5-6.0e-5     | 3.5e-5-5.2e-5      | 9.3e-5-1.4e-4  | NA              |

866



867 **Table 2. Gene Ontology term enrichment among genes in admixture blocks.**

868 FDR and number of genes are given for genes in all “high-confidence” admixture blocks. The last six columns indicate whether (1) or not (0) each term was  
 869 also enriched (FDR < 0.05) for subsets of admixture blocks involving each species and each block sharing category (“unique” – blocks unique to one Lake  
 870 Ejagham species; “shared: 2/3 species” – blocks shared among two/three Lake Ejagham species. No additional GO terms were enriched for admixture  
 871 blocks subsets only. Ontologies: BP = Biological Process, CC = Cellular Component, MF = Molecular Function.

872

| ontology | category   | term                                                                   | FDR      | nr. of genes | C. <i>deckerti</i> | C. <i>ejagham</i> | C. <i>fusiforme</i> | unique | shared: 2 species | shared: 3 species |
|----------|------------|------------------------------------------------------------------------|----------|--------------|--------------------|-------------------|---------------------|--------|-------------------|-------------------|
| BP       | GO:0007608 | sensory perception of smell                                            | 2.08E-09 | 8            | 1                  | 1                 | 0                   | 0      | 1                 | 0                 |
| MF       | GO:0004984 | olfactory receptor activity<br>detection of chemical stimulus involved | 2.08E-09 | 8            | 1                  | 1                 | 0                   | 0      | 1                 | 0                 |
| BP       | GO:0050911 | in sensory perception of smell                                         | 2.08E-09 | 8            | 1                  | 1                 | 0                   | 0      | 1                 | 0                 |
| BP       | GO:0050896 | response to stimulus                                                   | 6.69E-08 | 8            | 1                  | 1                 | 0                   | 0      | 1                 | 0                 |
| MF       | GO:0004871 | signal transducer activity<br>G-protein coupled receptor signaling     | 1.51E-07 | 14           | 1                  | 1                 | 0                   | 0      | 1                 | 0                 |
| BP       | GO:0007186 | pathway                                                                | 1.47E-05 | 13           | 1                  | 1                 | 0                   | 0      | 1                 | 0                 |
| MF       | GO:0004930 | G-protein coupled receptor activity                                    | 4.79E-05 | 12           | 1                  | 1                 | 0                   | 0      | 1                 | 0                 |
| BP       | GO:0007165 | signal transduction                                                    | 6.42E-05 | 14           | 1                  | 1                 | 0                   | 0      | 1                 | 0                 |
| CC       | GO:0005886 | plasma membrane                                                        | 2.55E-04 | 11           | 1                  | 1                 | 0                   | 0      | 1                 | 0                 |
| MF       | GO:0004336 | galactosylceramidase activity                                          | 4.49E-03 | 2            | 1                  | 1                 | 1                   | 0      | 0                 | 1                 |
| BP       | GO:0006683 | galactosylceramide catabolic process                                   | 4.49E-03 | 2            | 1                  | 1                 | 1                   | 0      | 0                 | 1                 |

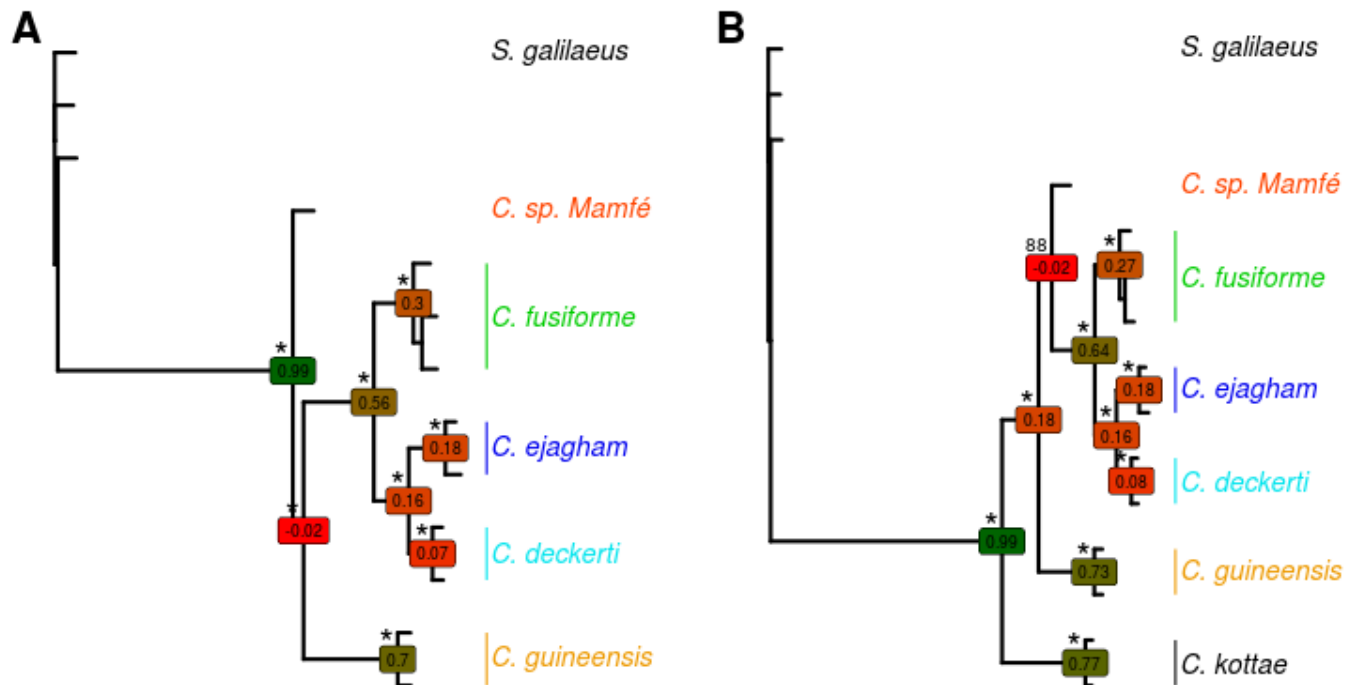874 **S1 Fig. ML trees of concatenated whole-genome sequences with different outgroup configurations.**

875 **(A)** Using only *S. galilaeus* as an outgroup; **(B)** Using both *S. galilaeus* and *C. kottae* as outgroups. In both cases, a monophyletic Ejagham *Coptodon*  
 876 radiation is inferred, as is a sister relationship between *C. deckerti* and *C. ejagham*. However, in (A), *C. guineensis*, and in (B), *C. sp. Mamfé* is inferred to be  
 877 sister to Ejagham *Coptodon*. Bootstrap support (\* = 100% support), and ICA (Internode Confidence All) scores based on ML gene trees for 100kb windows  
 878 are also shown. In both panels, ICA scores are negative for the node grouping Ejagham Coptodon and the inferred sister species, indicating that the  
 879 concatenated ML tree does not represent the most common gene tree, which instead has a sister relationship between *C. guineensis* and *C. sp. Mamfé*.

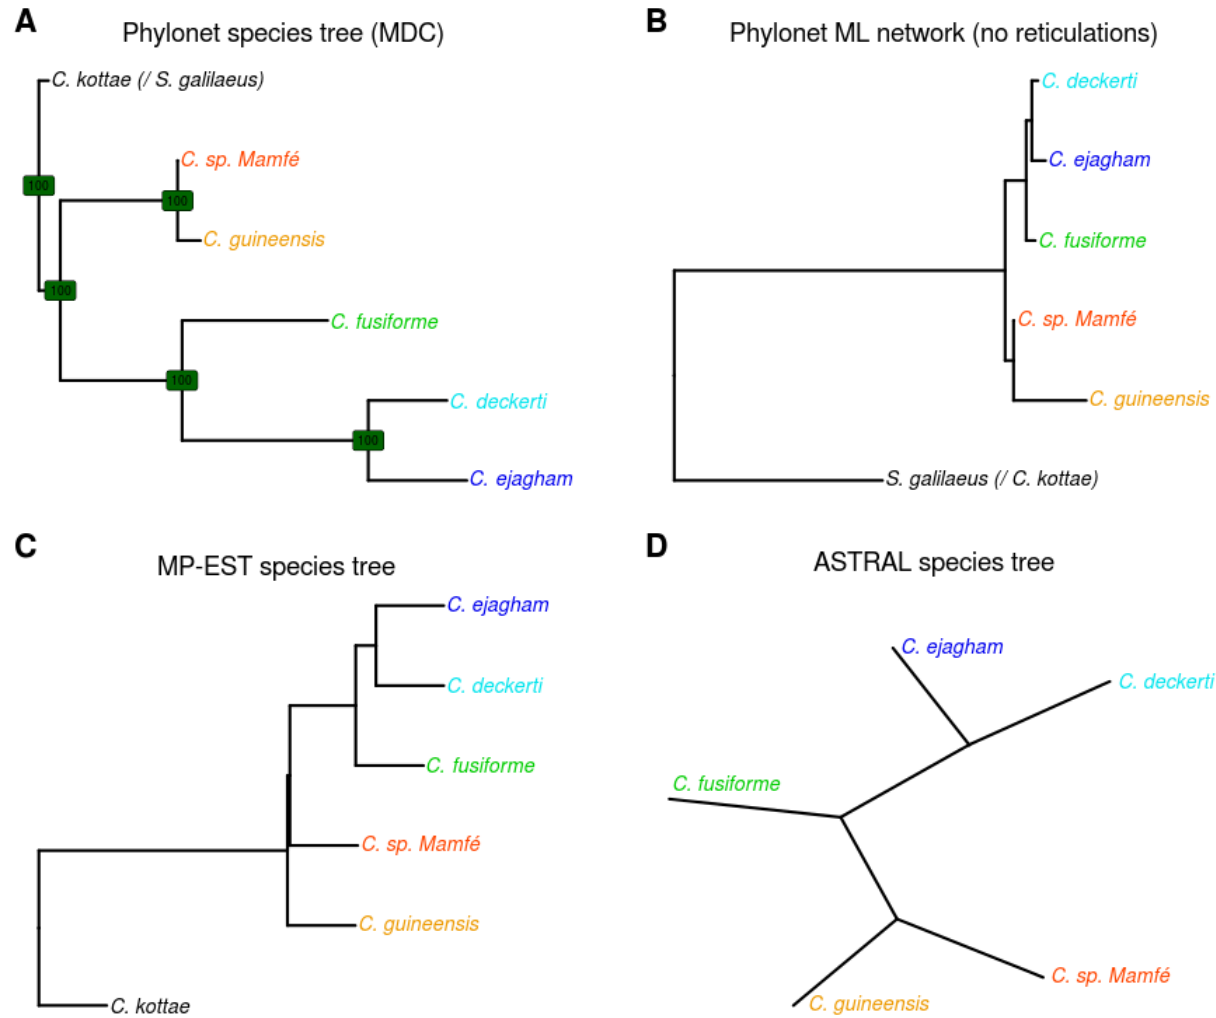

880 **S2 Fig. Species trees.**

881 All species trees were constructed from gene trees based on 100 kb genomic windows (rooted trees for A-C, and unrooted for D). All species trees have a  
 882 topology with a monophyletic Lake Ejagham radiation, and a sister relationship between *C. deckerti* and *C. ejagham*. The only difference among the tree  
 883 topologies is the position of *C. sp. Mamfé*, which is sister to the Ejagham radiation only using the maximum pseudo-likelihood method in MP-EST.

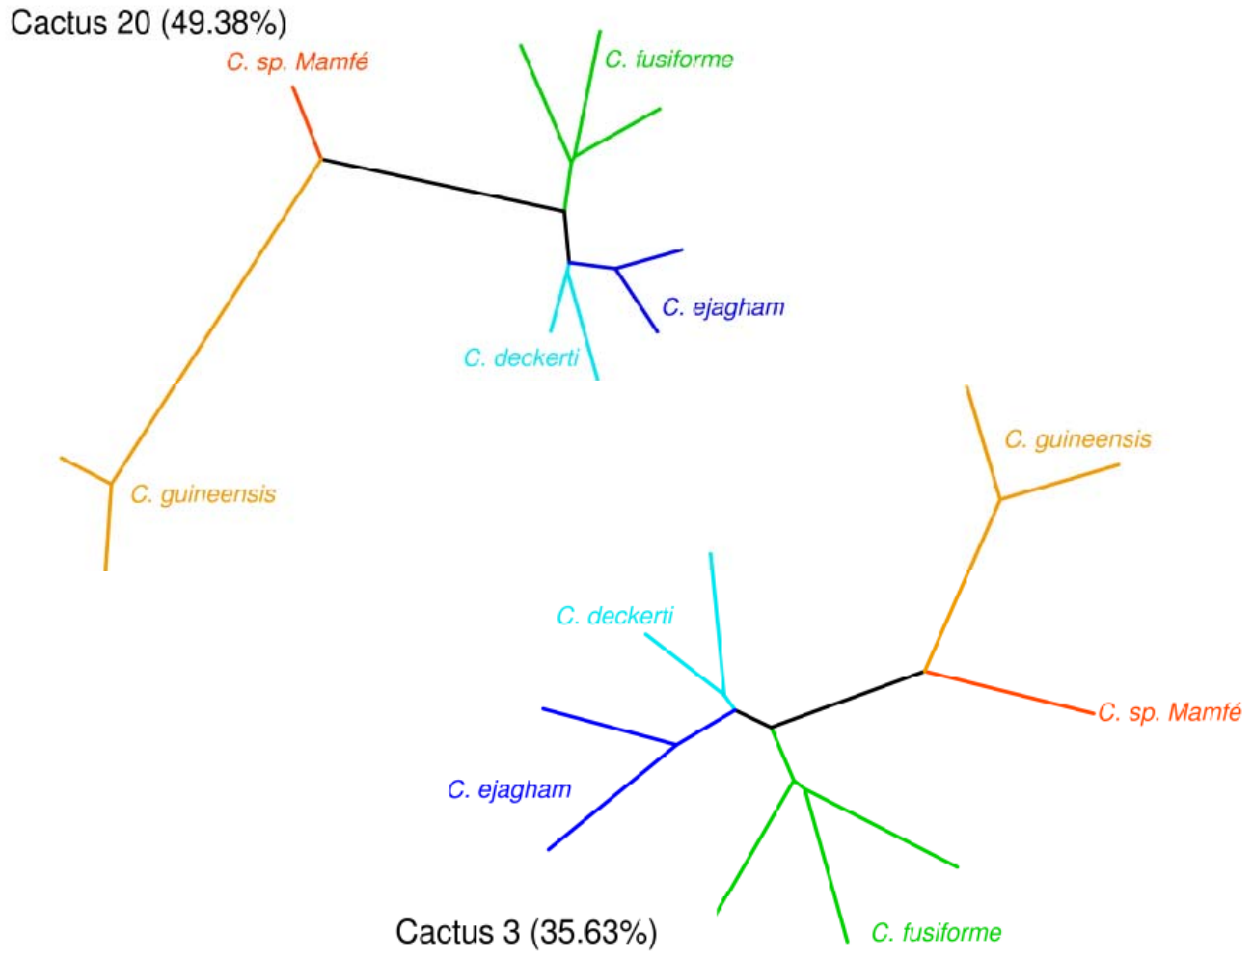

884 S3 Fig. The two most common Saguaro cacti have the same topology with a monophyletic Lake Ejagham radiation.

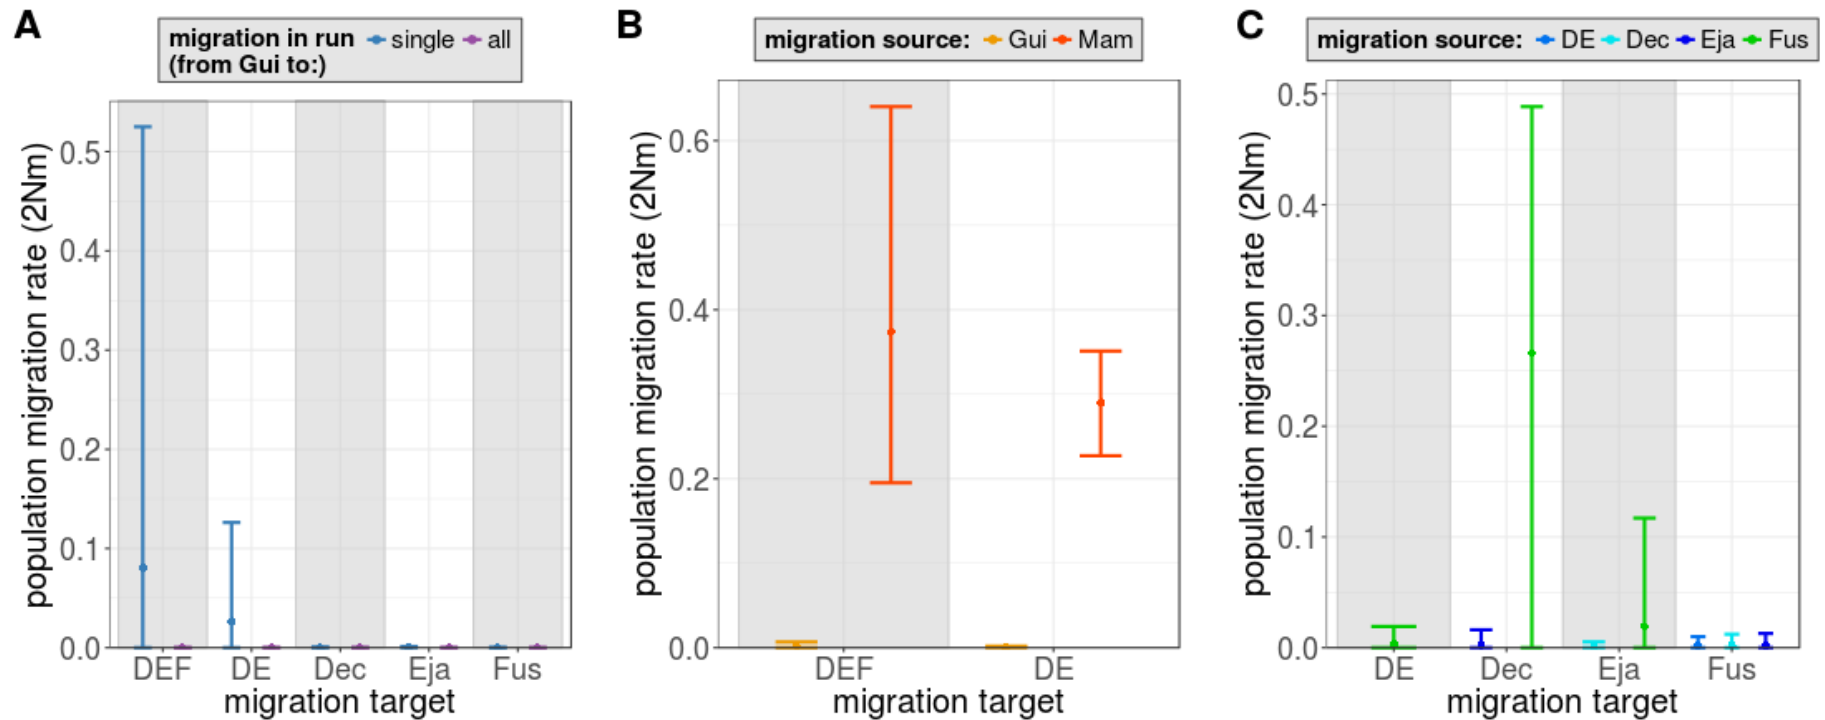

886 **S4 Fig. No significant migration from *C. guineensis* or within the Lake Ejagham radiation.**

887 Population migration rates estimated by G-PhoCS (**A-B**) from *C. guineensis*, and (**C**) within the Lake Ejagham radiation. In (B), migration bands are  
 888 estimated simultaneously from *C. sp. Mamfe* and *C. guineensis* to ancestral Lake Ejagham lineages (“DEF”, the ancestor of all three species, and “DE”, the  
 889 ancestor of *C. deckerti* and *C. ejagham*). While in (A), a lot of variance around the migration estimates from *C. guineensis* to DE and DEF are observed, this  
 890 is no longer the case in (B), when migration from *C. sp. Mamfé* is included. Estimates of migration within the radiation (C-D) are only from runs with single  
 891 migration bands.

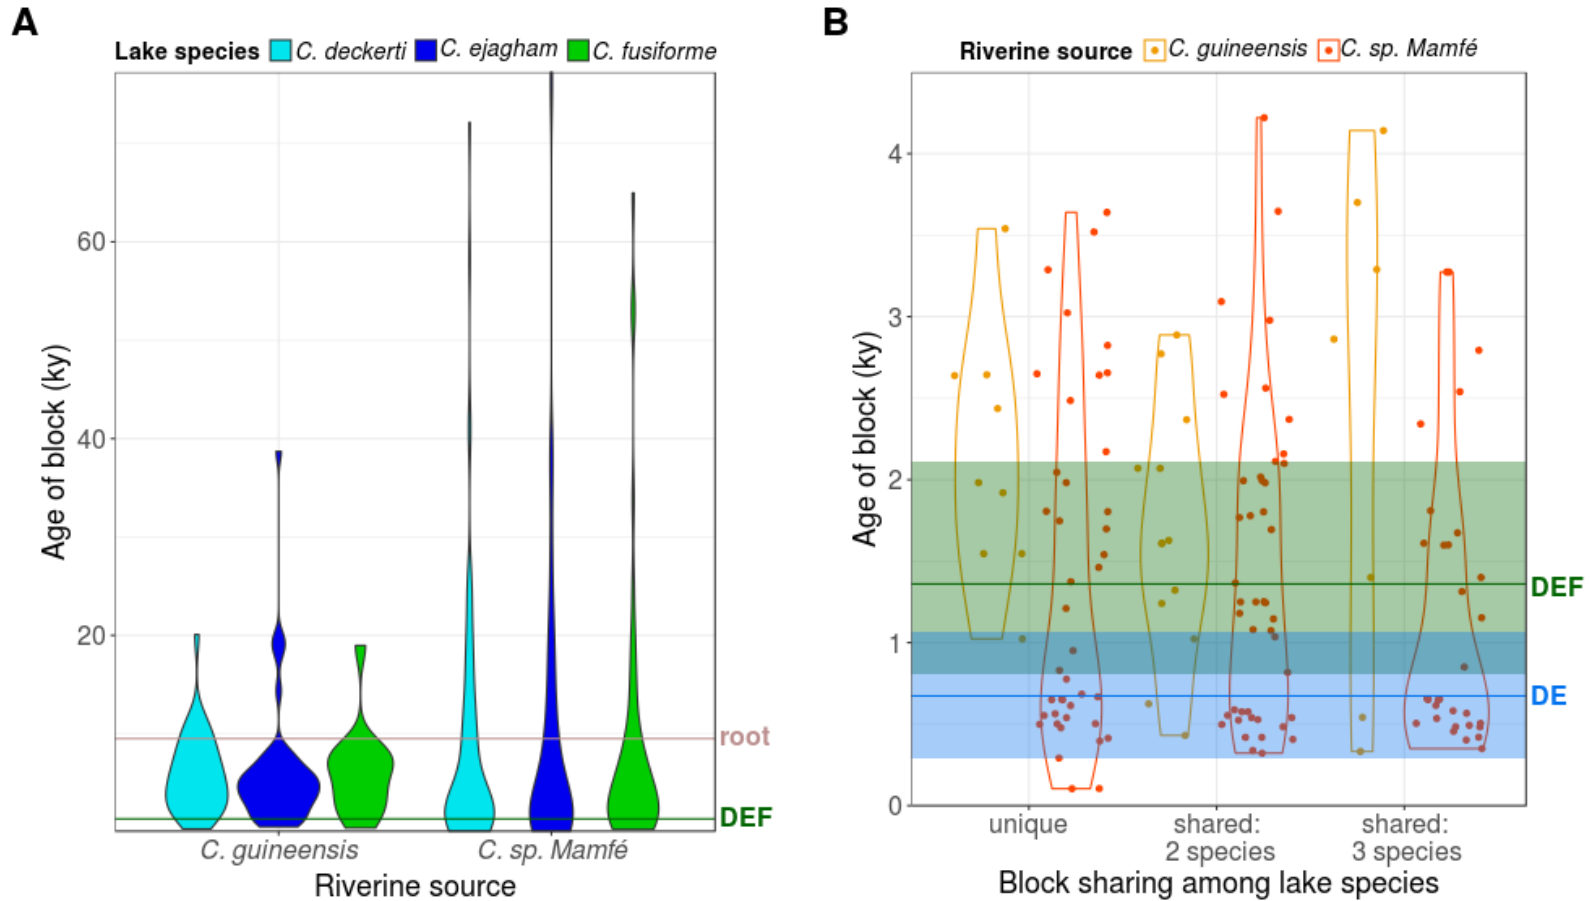

892 **S5 Fig. Age distribution of admixture blocks.**

893 **(A)** Age distribution of potential admixture blocks prior to filtering by age. The estimated time of divergence between the riverine and lake lineages (line  
 894 marked with “root”), and the estimated time of the first speciation event within the lake (line marked with “DEF”), as estimated by G-PhoCS, are also shown.  
 895 Most blocks are estimated to be of more recent origin than the divergence time of the lake lineage, but many others are older and are presumably caused by  
 896 lineage sorting processes rather than admixture. **(B)** Age distribution of “high-confidence” (age-filtered) admixture blocks by sharing category. Unique blocks  
 897 do not tend to be younger than shared blocks.

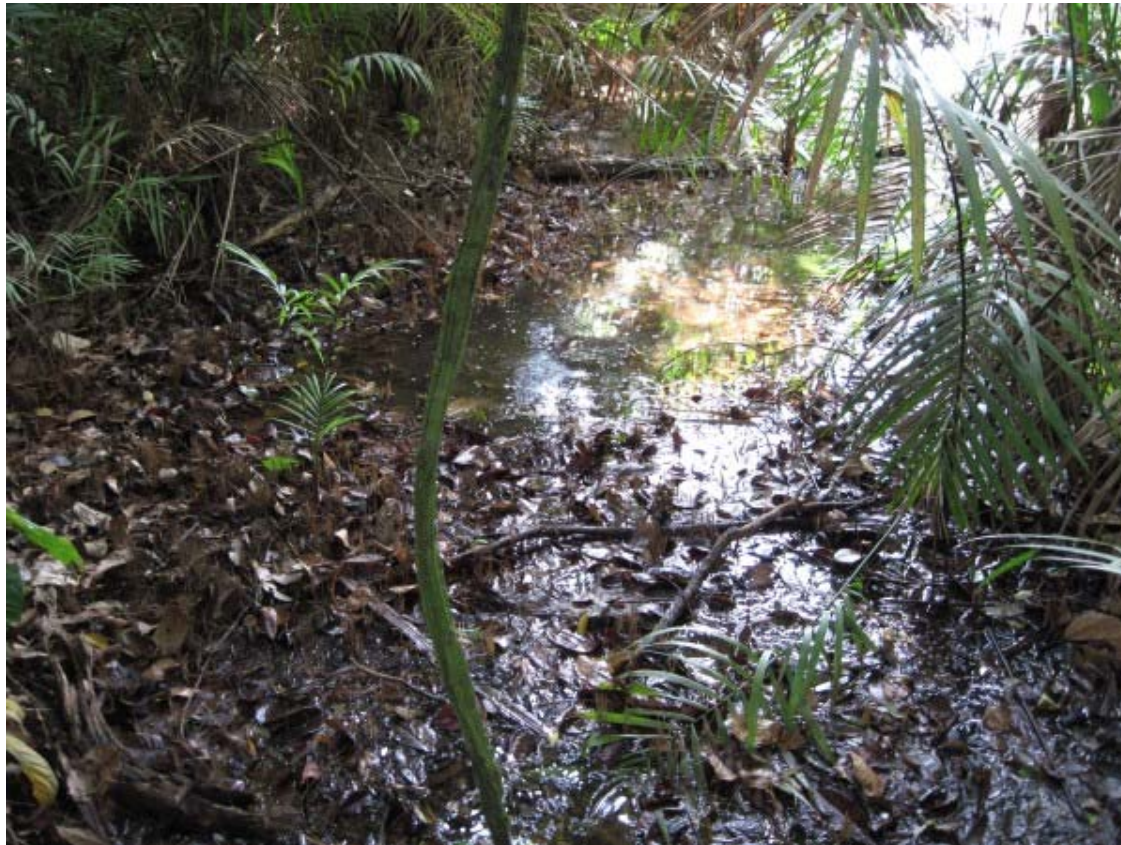

898 S6 Fig. Lake Ejagham's outlet stream, during the dry season (January 11<sup>th</sup>, 2010).

899 **S7 Table. Monophyly characteristics of each Saguaro cactus.**

900 "Percentage of genome" – The percentage of the genome that is assigned to each cactus. "Radiation monophyletic" – whether (1) or not (0) the Lake  
 901 Ejagham radiation as a whole forms a monophyletic group to the exclusion of the two riverine species *C. sp. Mamfé* and *C. guineensis*. "Each species  
 902 monophyletic" – whether (1) or not (0) individuals of each of the three Lake Ejagham are monophyletic.

| cactus nr. | percentage of genome | radiation monophyletic | all species monophyletic |
|------------|----------------------|------------------------|--------------------------|
| 0          | 0.56                 | 0                      | 0                        |
| 1          | 2.49                 | 1                      | 0                        |
| 2          | 0.89                 | 1                      | 1                        |
| <b>3</b>   | <b>35.63</b>         | <b>1</b>               | <b>1</b>                 |
| 4          | 0.81                 | 0                      | 0                        |
| 5          | 0.04                 | 0                      | 0                        |
| 6          | 0.89                 | 1                      | 0                        |
| 7          | 1.19                 | 0                      | 1                        |
| 8          | 0.31                 | 0                      | 0                        |
| 9          | 0.29                 | 0                      | 0                        |
| 10         | 0.49                 | 0                      | 0                        |
| 11         | 0.15                 | 0                      | 0                        |
| 12         | 1.12                 | 0                      | 0                        |
| 13         | 0.23                 | 0                      | 0                        |
| 14         | 0.39                 | 0                      | 0                        |
| 15         | 0.25                 | 1                      | 0                        |
| 16         | 0.21                 | 0                      | 0                        |
| 17         | 0.88                 | 0                      | 0                        |
| 18         | 0.10                 | 1                      | 0                        |
| 19         | 0.01                 | 0                      | 0                        |
| <b>20</b>  | <b>49.38</b>         | <b>1</b>               | <b>1</b>                 |
| 21         | 0.06                 | 0                      | 0                        |
| 22         | 0.05                 | 1                      | 0                        |
| 23         | 0.32                 | 0                      | 1                        |
| 24         | 0.01                 | 1                      | 1                        |
| 25         | 0.06                 | 1                      | 0                        |
| 26         | 2.75                 | 0                      | 0                        |
| 27         | 0.15                 | 0                      | 0                        |
| 28         | 0.19                 | 1                      | 1                        |
| 29         | 0.02                 | 1                      | 0                        |
| 30         | 0.06                 | 1                      | 0                        |



903 **S8 Table. All species configurations used for calculation of the  $f_d$  statistic.**

904

| <b>species A</b>     | <b>species B</b>     | <b>species C</b>     | <b>outgroup</b>     |
|----------------------|----------------------|----------------------|---------------------|
| <i>C. fusiforme</i>  | <i>C. deckerti</i>   | <i>C. sp. Mamfé</i>  | <i>S. galilaeus</i> |
| <i>C. fusiforme</i>  | <i>C. deckerti</i>   | <i>C. guineensis</i> | <i>S. galilaeus</i> |
| <i>C. fusiforme</i>  | <i>C. ejagham</i>    | <i>C. sp. Mamfé</i>  | <i>S. galilaeus</i> |
| <i>C. fusiforme</i>  | <i>C. ejagham</i>    | <i>C. guineensis</i> | <i>S. galilaeus</i> |
| <i>C. deckerti</i>   | <i>C. ejagham</i>    | <i>C. sp. Mamfé</i>  | <i>S. galilaeus</i> |
| <i>C. deckerti</i>   | <i>C. ejagham</i>    | <i>C. guineensis</i> | <i>S. galilaeus</i> |
| <i>C. deckerti</i>   | <i>C. fusiforme</i>  | <i>C. sp. Mamfé</i>  | <i>S. galilaeus</i> |
| <i>C. deckerti</i>   | <i>C. fusiforme</i>  | <i>C. guineensis</i> | <i>S. galilaeus</i> |
| <i>C. ejagham</i>    | <i>C. fusiforme</i>  | <i>C. sp. Mamfé</i>  | <i>S. galilaeus</i> |
| <i>C. ejagham</i>    | <i>C. fusiforme</i>  | <i>C. guineensis</i> | <i>S. galilaeus</i> |
| <i>C. ejagham</i>    | <i>C. deckerti</i>   | <i>C. sp. Mamfé</i>  | <i>S. galilaeus</i> |
| <i>C. ejagham</i>    | <i>C. deckerti</i>   | <i>C. guineensis</i> | <i>S. galilaeus</i> |
| <i>C. sp. Mamfé</i>  | <i>C. guineensis</i> | <i>C. deckerti</i>   | <i>S. galilaeus</i> |
| <i>C. sp. Mamfé</i>  | <i>C. guineensis</i> | <i>C. ejagham</i>    | <i>S. galilaeus</i> |
| <i>C. sp. Mamfé</i>  | <i>C. guineensis</i> | <i>C. fusiforme</i>  | <i>S. galilaeus</i> |
| <i>C. guineensis</i> | <i>C. sp. Mamfe</i>  | <i>C. deckerti</i>   | <i>S. galilaeus</i> |
| <i>C. guineensis</i> | <i>C. sp. Mamfe</i>  | <i>C. ejagham</i>    | <i>S. galilaeus</i> |
| <i>C. guineensis</i> | <i>C. sp. Mamfe</i>  | <i>C. fusiforme</i>  | <i>S. galilaeus</i> |

905

906 **S9 Table. Settings for G-PhoCS.**

907

**General settings**

|                          |           |
|--------------------------|-----------|
| locus-mut-rate           | VAR 1     |
| mcmc-iterations          | 5,000,000 |
| mcmc-sample-skip         | 9         |
| iterations-per-log       | 100       |
| logs-per-line            | 100       |
| find-finetunes           | TRUE      |
| find-finetunes-num-steps | 1,000     |
| tau-theta-print          | 10000     |
| mig-rate-print           | 0.001     |
| tau-theta-alpha          | 1         |
| tau-theta-beta           | 500       |
| mig-rate-alpha           | 0.002     |
| mig-rate-beta            | 0.00001   |
| start-mig                | 25,000    |

**Lineage-specific priors**

|                                 |        |
|---------------------------------|--------|
| <i>C. deckerti</i> theta-beta   | 5,000  |
| <i>C. ejagham</i> theta-beta    | 10,000 |
| <i>C. fusiforme</i> theta-beta  | 3,000  |
| <i>C. sp. Mamfé</i> theta-beta  | 250    |
| <i>C. guineensis</i> theta-beta | 2,000  |
| DE tau-beta                     | 50,000 |
| DE theta-beta                   | 4,000  |
| DEF tau-beta                    | 30,000 |
| DEF theta-beta                  | 3,000  |
| AU tau-beta                     | 10,000 |
| AU theta-beta                   | 300    |
| root tau-beta                   | 4,000  |
| root theta-beta                 | 300    |

908

909  
910

**S10 Table. Olfactory receptor genes found in an admixture block between *C. sp. Mamfé* and *C. deckerti/C. Ejagham*.**

| <b>Entrez Gene ID</b> | <b>Ensembl Gene ID</b> | <b>Gene description</b>              | <b>1-to-1 orthologues</b> |
|-----------------------|------------------------|--------------------------------------|---------------------------|
| 100695228             | ENSONIG00000016134     | olfactory receptor 6N2-like          | NA                        |
| 100694957             | ENSONIG00000016134     | olfactory receptor 2AT4-like         | NA                        |
| 100707735             | ENSONIG00000020687     | olfactory receptor 11A1-like         | NA                        |
| 100692273             | ENSONIG00000020687     | olfactory receptor 6N2-like          | NA                        |
| 100693089             | ENSONIG00000020689     | olfactory receptor-like protein OLF4 | NA                        |
| 100694162             | ENSONIG00000020690     | olfactory receptor 4C12-like         | NA                        |
| 100691734             | ENSONIG00000020690     | olfactory receptor 13C5-like         | NA                        |
| 100696017             | ENSONIG00000020691     | olfactory receptor 6N2-like          | ENSPFOG00000020775        |

911

## 912 References

- Arnegard, M.E., and Kondrashov, A.S. (2004). Sympatric speciation by sexual selection alone is unlikely. *Evolution* 58, 222–237.
- Azzouzi, N., Barloy-Hubler, F., and Galibert, F. (2014). Inventory of the cichlid olfactory receptor gene repertoires: identification of olfactory genes with more than one coding exon. *BMC Genomics* 15, 586.
- Barluenga, M., Stölting, K.N., Salzburger, W., Muschick, M., and Meyer, A. (2006). Sympatric speciation in Nicaraguan crater lake cichlid fish. *Nature* 439, 719–723.
- Benjamini, Y., and Hochberg, Y. (1995). Controlling the false discovery rate: a practical and powerful approach to multiple testing. *J R Stat Soc B* 57, 289–300.
- Bergey, C. (2012). vcf-tab-to-fast. <http://code.google.com/p/vcf-tab-to-fast>. Accessed: 2016-11-17.
- Berlocher, S.H., and Feder, J.L. (2002). Sympatric speciation in phytophagous insects: moving beyond controversy? *Annual Review of Entomology* 47, 773–815.
- Blais, J., Plenderleith, M., Rico, C., Taylor, M.I., Seehausen, O., van Oosterhout, C., and Turner, G.F. (2009). Assortative mating among Lake Malawi cichlid fish populations is not simply predictable from male nuptial colour. *BMC Evolutionary Biology* 9, 53.
- Bolnick, D.I. (2004). Waiting for sympatric speciation. *Evolution* 58, 895–899.
- Bolnick, D.I., and Fitzpatrick, B.M. (2007). Sympatric speciation: models and empirical evidence. *Annual Review of Ecology, Evolution, and Systematics* 38, 459–487.
- Brawand, D., Wagner, C.E., Li, Y.I., Malinsky, M., Keller, I., Fan, S., Simakov, O., Ng, A.Y., Lim, Z.W., Bezault, E., et al. (2014). The genomic substrate for adaptive radiation in African cichlid fish. *Nature* 513, 375–381.
- Bryant, D., and Moulton, V. (2004). Neighbor-Net: an agglomerative method for the construction of phylogenetic networks. *Mol Biol Evol* 21, 255–265.
- Choi, J.Y., Platts, A.E., Fuller, D.Q., Hsing (邢禹依), Y.-I., Wing, R.A., and Purugganan, M.D. (2017). The rice paradox: multiple origins but single domestication in asian rice. *Mol Biol Evol* 34, 969–979.
- Cornen, G., Bande, Y., Giresse, P., and Maley, J. (1992). The nature and chronostratigraphy of Quaternary pyroclastic accumulations from lake Barombi Mbo (West-Cameroon). *Journal of Volcanology and Geothermal Research* 51, 357–374.
- Coyne, J.A., and Orr, H.A. (2004). *Speciation* (Sunderland, MA: Sinauer Associates).

- Crapon de Caprona, M.-D., and Ryan, M.J. (1990). Conspecific mate recognition in swordtails, *Xiphophorus nigrensis* and *X. pygmaeus* (Poeciliidae): olfactory and visual cues. *Animal Behaviour* 39, 290–296.
- Danecek, P., Auton, A., Abecasis, G., Albers, C.A., Banks, E., DePristo, M.A., Handsaker, R.E., Lunter, G., Marth, G.T., Sherry, S.T., et al. (2011). The variant call format and VCFtools. *Bioinformatics* 27, 2156–2158.
- DePristo, M.A., Banks, E., Poplin, R., Garimella, K.V., Maguire, J.R., Hartl, C., Philippakis, A.A., del Angel, G., Rivas, M.A., Hanna, M., et al. (2011). A framework for variation discovery and genotyping using next-generation DNA sequencing data. *Nature Genetics* 43, 491–498.
- Dieckmann, U., and Doebeli, M. (1999). On the origin of species by sympatric speciation. *Nature* 400, 354–357.
- Dunz, A.R., and Schlieven, U.K. (2010). Description of a *Tilapia* (*Coptodon*) species flock of Lake Ejagham (Cameroon), including a redescription of *Tilapia deckerti* Thys van den Audenaerde, 1967. *Spixiana* 33, 251–280.
- Durinck, S., Spellman, P.T., Birney, E., and Huber, W. (2009). Mapping identifiers for the integration of genomic datasets with the R/Bioconductor package biomaRt. *Nat Protoc* 4, 1184–1191.
- Grant, P.R., and Grant, B.R. (2009). Sympatric speciation, immigration, and hybridization in island birds. In *The Theory of Island Biogeography Revisited*, (Princeton University Press), pp. 326–357.
- Green, J., and Kling, G.W. (1988). The genus *Daphnia* in Cameroon, West Africa. *Hydrobiologia* 160, 257–261.
- Green, R.E., Krause, J., Briggs, A.W., Maricic, T., Stenzel, U., Kircher, M., Patterson, N., Li, H., Zhai, W., Fritz, M.H.-Y., et al. (2010). A draft sequence of the Neandertal genome. *Science* 328, 710–722.
- Gronau, I., Hubisz, M.J., Gulko, B., Danko, C.G., and Siepel, A. (2011). Bayesian inference of ancient human demography from individual genome sequences. *Nat Genet* 43, 1031–1034.
- Guo, B., Chain, F.J.J., Bornberg-Bauer, E., Leder, E.H., and Merilä, J. (2013). Genomic divergence between nine- and three-spined sticklebacks. *BMC Genomics* 14, 756.
- Hadid, Y., Tzur, S., Pavlíček, T., Šumbera, R., Šklíba, J., Lövy, M., Fragman-Sapir, O., Beiles, A., Arieli, R., Raz, S., et al. (2013). Possible incipient sympatric ecological speciation in blind mole rats (*Spalax*). *PNAS* 110, 2587–2592.
- Hadid, Y., Pavlíček, T., Beiles, A., Ianovici, R., Raz, S., and Nevo, E. (2014). Sympatric incipient speciation of spiny mice *Acomys* at “Evolution Canyon,” Israel. *PNAS* 111, 1043–1048.
- Hung, C.-M., Shaner, P.-J.L., Zink, R.M., Liu, W.-C., Chu, T.-C., Huang, W.-S., and Li, S.-H. (2014). Drastic population fluctuations explain the rapid

extinction of the passenger pigeon. *PNAS* 111, 10636–10641.

Huson, D.H., and Bryant, D. (2006). Application of Phylogenetic Networks in Evolutionary Studies. *Mol Biol Evol* 23, 254–267.

Kautt, A.F., Machado-Schiaffino, G., Torres-Dowdall, J., and Meyer, A. (2016a). Incipient sympatric speciation in Midas cichlid fish from the youngest and one of the smallest crater lakes in Nicaragua due to differential use of the benthic and limnetic habitats? *Ecology and Evolution* 6, 5342–5357.

Kautt, A.F., Machado-Schiaffino, G., and Meyer, A. (2016b). Multispecies outcomes of sympatric speciation after admixture with the source population in two radiations of nicaraguan crater lake cichlids. *PLOS Genetics* 12, e1006157.

Keijman, M. (2010). Tilapia & Co — Enkele onbeschreven en minder bekende Tilapia-soorten globaal voorgesteld. *Cichlidae (Nederlandse Vereniging van Cichlidenliefhebbers)* 36, 19–29.

Keller-Costa, T., Canário, A.V.M., and Hubbard, P.C. (2015). Chemical communication in cichlids: A mini-review. *Gen. Comp. Endocrinol.* 221, 64–74.

Kodric-Brown, A., and Strecker, U. (2001). Responses of *Cyprinodon maya* and *C. labiosus* females to visual and olfactory cues of conspecific and heterospecific males. *Biological Journal of the Linnean Society* 74, 541–548.

Kondrashov, A.S., and Kondrashov, F.A. (1999). Interactions among quantitative traits in the course of sympatric speciation. *Nature* 400, 351–354.

Lamichhaney, S., Berglund, J., Almén, M.S., Maqbool, K., Grabherr, M., Martinez-Barrio, A., Promerová, M., Rubin, C.-J., Wang, C., Zamani, N., et al. (2015). Evolution of Darwin's finches and their beaks revealed by genome sequencing. *Nature* 518, 371–375.

Li, H. (2009). SNPable. <http://lh3lh3.users.sourceforge.net/snpsable.shtml>. Accessed: 2016-09-20.

Li, H. (2013). Aligning sequence reads, clone sequences and assembly contigs with BWA-MEM. ArXiv:1303.3997 [q-Bio].

Liu, L., Yu, L., and Edwards, S.V. (2010). A maximum pseudo-likelihood approach for estimating species trees under the coalescent model. *BMC Evol. Biol.* 10, 302.

Mailund, A.T. (2014). Estimating admixture proportions. <http://www.mailund.dk/index.php/2014/12/17/estimating-admixture-proportions/>. Accessed: 2017-03-04.

Malinsky, M., Challis, R.J., Tyers, A.M., Schiffels, S., Terai, Y., Ngatunga, B.P., Miska, E.A., Durbin, R., Genner, M.J., and Turner, G.F. (2015). Genomic islands of speciation separate cichlid ecomorphs in an East African crater lake. *Science* 350, 1493–1498.

Martin, C.H. (2012). Weak disruptive selection and incomplete phenotypic divergence in two classic examples of sympatric speciation: Cameroon crater lake cichlids. *The American Naturalist* 180, E90–E109.

- Martin, C.H. (2013). Strong assortative mating by diet, color, size, and morphology but limited progress toward sympatric speciation in a classic example: Cameroon crater lake cichlids. *Evolution* 67, 2114–2123.
- Martin, S. (2015). Genomics\_general. [https://github.com/simonhmartin/genomics\\_general](https://github.com/simonhmartin/genomics_general). Accessed: 2016-10-03.
- Martin, C.H., and Höhna, S. (2017). New evidence for the recent divergence of Devil’s Hole pupfish and the plausibility of elevated mutation rates in endangered taxa. *Mol. Ecol.*
- Martin, C.H., Cutler, J.S., Friel, J.P., Dening Touokong, C., Coop, G., and Wainwright, P.C. (2015a). Complex histories of repeated gene flow in Cameroon crater lake cichlids cast doubt on one of the clearest examples of sympatric speciation. *Evolution* 69, 1406–1422.
- Martin, C.H., Höhna, S., Crawford, J.E., Turner, B.J., Richards, E.J., and Simons, L.H. (2017). The complex effects of demographic history on the estimation of substitution rate: concatenated gene analysis results in no more than twofold overestimation. *Proc. R. Soc. B* 284, 20170537.
- Martin, S.H., Davey, J.W., and Jiggins, C.D. (2015b). Evaluating the use of ABBA–BABA statistics to locate introgressed loci. *Mol Biol Evol* 32, 244–257.
- McLennan, D.A. (2004). Male Brook Sticklebacks’ (*Culaea inconstans*) response to olfactory cues. *Behaviour* 141, 1411–1424.
- McLennan, D.A., and Ryan, M.J. (1999). Interspecific recognition and discrimination based upon olfactory cues in northern swordtails. *Evolution* 53, 880–888.
- McManus, K.F., Kelley, J.L., Song, S., Veeramah, K.R., Woerner, A.E., Stevison, L.S., Ryder, O.A., Ape Genome Project, G., Kidd, J.M., Wall, J.D., et al. (2015). Inference of gorilla demographic and selective history from whole-genome sequence data. *Mol Biol Evol* 32, 600–612.
- Meier, J.I., Marques, D.A., Mwaiko, S., Wagner, C.E., Excoffier, L., and Seehausen, O. (2017). Ancient hybridization fuels rapid cichlid fish adaptive radiations. *Nature Communications* 8, 14363.
- Mirarab, S., Reaz, R., Bayzid, M.S., Zimmermann, T., Swenson, M.S., and Warnow, T. (2014). ASTRAL: genome-scale coalescent-based species tree estimation. *Bioinformatics* 30, i541–i548.
- Neumann, D. (2011). Two new sympatric *Sarotherodon* species (pisces: *Cichlidae*) endemic to Lake Ejagham, Cameroon, west-central Africa, with comments on the *Sarotherodon galilaeus* species complex. *Zootaxa* 20, 5326.
- Niimura, Y., and Nei, M. (2005). Evolutionary dynamics of olfactory receptor genes in fishes and tetrapods. *PNAS* 102, 6039–6044.
- Patterson, N.J., Moorjani, P., Luo, Y., Mallick, S., Rohland, N., Zhan, Y., Genschoreck, T., Webster, T., and Reich, D. (2012). Ancient admixture in human history. *Genetics* 192, 1065–1093.

- Pease, J.B., and Hahn, M.W. (2015). Detection and polarization of introgression in a five-taxon phylogeny. *Syst Biol* 64, 651–662.
- Plenderleith, M., van Oosterhout, C., Robinson, R.L., and Turner, G.F. (2005). Female preference for conspecific males based on olfactory cues in a Lake Malawi cichlid fish. *Biol Lett* 1, 411–414.
- Rambaut, A., Suchard, M., Xie, D., and Drummond, A. (2014). Tracer v1.6. <http://beast.bio.ed.ac.uk/Tracer>.
- Recknagel, H., Elmer, K.R., and Meyer, A. (2013). A hybrid genetic linkage map of two ecologically and morphologically divergent Midas cichlid fishes (*Amphilophus* spp.) obtained by massively parallel DNA sequencing (ddRADSeq). *G3: Genes, Genomes, Genetics* 3, 65–74.
- Richards, E.J., and Martin, C.H. (2017). Adaptive introgression from distant Caribbean islands contributed to the diversification of a microendemic adaptive radiation of trophic specialist pupfishes. *PLOS Genetics* 13, e1006919.
- Richards, E., Poelstra, J., and Martin, C. (2017). Don't throw out the sympatric species with the crater lake water: fine-scale investigation of introgression provides weak support for functional role of secondary gene flow in one of the clearest examples of sympatric speciation. *BioRxiv* 217984.
- Ryan, P.G., Bloomer, P., Moloney, C.L., Grant, T.J., and Delport, W. (2007). Ecological speciation in South Atlantic island finches. *Science* 315, 1420–1423.
- Salichos, L., Stamatakis, A., and Rokas, A. (2014). Novel information theory-based measures for quantifying incongruence among phylogenetic trees. *Mol. Biol. Evol.* 31, 1261–1271.
- Savolainen, V., Anstett, M.-C., Lexer, C., Hutton, I., Clarkson, J.J., Norup, M.V., Powell, M.P., Springate, D., Salamin, N., and Baker, W.J. (2006). Sympatric speciation in palms on an oceanic island. *Nature* 441, 210–213.
- Schliewen, U.K., and Klee, B. (2004). Reticulate sympatric speciation in Cameroonian crater lake cichlids. *Front Zool* 1, 5.
- Schliewen, U., Rassmann, K., Markmann, M., Markert, J., Kocher, T., and Tautz, D. (2001). Genetic and ecological divergence of a monophyletic cichlid species pair under fully sympatric conditions in Lake Ejagham, Cameroon. *Molecular Ecology* 10, 1471–1488.
- Schliewen, U.K., Tautz, D., and Pääbo, S. (1994). Sympatric speciation suggested by monophyly of crater lake cichlids. *Nature* 368, 629–632.
- Seehausen, O. (2004). Hybridization and adaptive radiation. *Trends in Ecology & Evolution* 19, 198–207.
- Servedio, M.R., Doorn, G.S.V., Kopp, M., Frame, A.M., and Nosil, P. (2011). Magic traits in speciation: 'magic' but not rare? *Trends in Ecology & Evolution* 26, 389–397.



- Smadja, C., and Butlin, R.K. (2008). On the scent of speciation: the chemosensory system and its role in premating isolation. *Heredity* 102, hdy200855.
- Sorenson, M.D., Sefc, K.M., and Payne, R.B. (2003). Speciation by host switch in brood parasitic indigobirds. *Nature* 424, 928–931.
- Stager, J.C., Alton, K., Martin, C.H., King, D.T., Petruny, L.W., Wiltse, B., and Livingstone, D.A. (2017). On the age and origin of Lake Ejagham, Cameroon, and its endemic fishes. *Quaternary Research* 1–12.
- Stamatakis, A. (2014). RAxML version 8: a tool for phylogenetic analysis and post-analysis of large phylogenies. *Bioinformatics* 30, 1312–1313.
- Than, C., and Nakhleh, L. (2009). Species tree inference by minimizing deep coalescences. *PLOS Computational Biology* 5, e1000501.
- Than, C., Ruths, D., and Nakhleh, L. (2008). PhyloNet: a software package for analyzing and reconstructing reticulate evolutionary relationships. *BMC Bioinformatics* 9, 322.
- Turelli, M., Barton, N.H., and Coyne, J.A. (2001). Theory and speciation. *Trends in Ecology & Evolution* 16, 330–343.
- Van der Auwera, G.A., Carneiro, M.O., Hartl, C., Poplin, R., Del Angel, G., Levy-Moonshine, A., Jordan, T., Shakir, K., Roazen, D., Thibault, J., et al. (2013). From FastQ data to high confidence variant calls: the Genome Analysis Toolkit best practices pipeline. *Curr Protoc Bioinformatics* 43, 11.10.1-33.
- Wagner, C.E., Harmon, L.J., and Seehausen, O. (2012). Ecological opportunity and sexual selection together predict adaptive radiation. *Nature* 487, 366.
- Ward, B.J., and van Oosterhout, C. (2016). Hybridcheck: software for the rapid detection, visualization and dating of recombinant regions in genome sequence data. *Mol Ecol Resour* 16, 534–539.
- Young, M.D., Wakefield, M.J., Smyth, G.K., and Oshlack, A. (2010). Gene ontology analysis for RNA-seq: accounting for selection bias. *Genome Biology* 11, R14.
- Zamani, N., Russell, P., Lantz, H., Hoepfner, M.P., Meadows, J.R., Vijay, N., Mauceli, E., Palma, F. di, Lindblad-Toh, K., Jern, P., et al. (2013). Unsupervised genome-wide recognition of local relationship patterns. *BMC Genomics* 14, 347.
